# Supplementary material for: A large-scale solar-driven direct air capture and utilisation process to produce sustainable aviation fuel
Source: Research Square preprint supplement (doi:10.21203/rs.3.rs-5065108/v1), 2025-11-04
Supplement: Supplementary file 1 [file 95a5405c886110b2c2eb68b2.docx]

# Supplementary Information

**A large-scale solar-driven direct air capture and utilisation process to produce sustainable aviation fuel**

*Yide Han1, Olajide Otitoju1, Ariane D.N. Kamkeng1, Meihong Wang1,*, Hui Yan2, Fisher Millard3, Wenli Du4,*, Feng Qian4,**

*1Department of Chemical and Biological Engineering, The University of Sheffield, Sheffield S1 3JD, UK*

*2Department of Electrical and Electronic Engineering, University of Manchester, Manchester* *M13 9PL, UK*

*3Net Zero Energy,* *AtkinsRéalis, Edinburgh, EH3 8EG, UK*

*4Key Laboratory of Advanced Control and Optimization for Chemical Process of Ministry of Education, East China University of Science and Technology, 130 Meilong Road, Shanghai 200237, China*

**Correspondence:* [*meihong.wang@sheffield.ac.uk*](mailto:meihong.wang@sheffield.ac.uk)

**Contents**

Note S1: Simulation and comparison of DAC process at commercial scale

Note S2: Modelling, simulation and validation of solar calciner at pilot scale

Note S3: Modelling, simulation and validation of CO2-FTS at lab scale

Note S4: Scale-up approach of fluidized bed

Note S5: Techno-economic analysis of base case

Note S6: Sensitivity analysis

Supplemental References

## Note S1: Simulation and comparison of DAC process at commercial scale

The chemistry of CO2 absorption with aqueous KOH is described by the set of equilibrium reactions (Table S1) and the kinetic reactions (Table S2).

Table S1: Chemistry settings of equilibrium reactions for rate-based air contactor model

|  | | | | |
| --- | --- | --- | --- | --- |
| Equilibrium Reaction | A | B | C | D |
|  | 231.465 | -12092.1 | -36.7816 | 0 |
|  | 216.05 | -12431.7 | -35.4819 | 0 |
|  | 132.899 | -13445.9 | -22.4773 | 0 |

Table S2: Chemistry settings of kinetic reactions for rate-based air contactor model

|  | | | |
| --- | --- | --- | --- |
| Kinetic Reaction | K | n | E (J/kmol) |
|  | 4.32e+13 | 0 | 5.54709e+07 |
|  | 2.38e+17 | 0 | 1.23305e+08 |

The simulation approach of one modular unit of air contactor was adopted from Sabatino et al.1. This model effectively represents the air contactor unit design presented by Keith et al.2. Furthermore, we enhanced the rate-based model by incorporating modified built-in packing allowing us to represent the Brentwood XF12560 packing accurately, and to correlate the packing pressure drop based on pilot experiments.

Since the Brentwood XF12560 packing is not a built-in option in Aspen Plus®, we used a modified Sulzer 250Y PVC packing to represent it. The specific information regarding the Brentwood XF12560 packing—such as the specific surface area (SSA), void fraction and liquid holdup—is provided in the table below and was used to modify the default data for the Sulzer 250Y PVC packing.

Table S3: Modified Sulzer 250Y PVC packing setting in Aspen Plus®

| **Parameter** | **Settings** | **Reference** |
| --- | --- | --- |
| Material | PVC | Holmes (2010)3 |
| SSA | 210 m2/m3 |
| Liquid hold up | 35 g/m2 |
| Void fraction | 0.95 | Cooling Tower Depot® (2023)4 and Fair et al. (2000)5 |

**Calculation of packing pressure drop:**

The pressure drop was estimated using the correlations developed for Brentwood XF12560 packing. This pressure drop correlation provided by Brentwood Industries Inc.6 was adapted from the pilot experimental data (air velocity between 1-2 m/s) given in Keith et al.2.

Where is the pressure drop in Brentwood XF12560 packing (Pa)

is the air velocity driven by the air contactor (m/s)

is the average liquid flow rate on the unit packing area (L/m2 s)

ATD is the air travel distance (m)

a, b, c are fitting parameters (a=1.06, b=3.31, c=0.79)


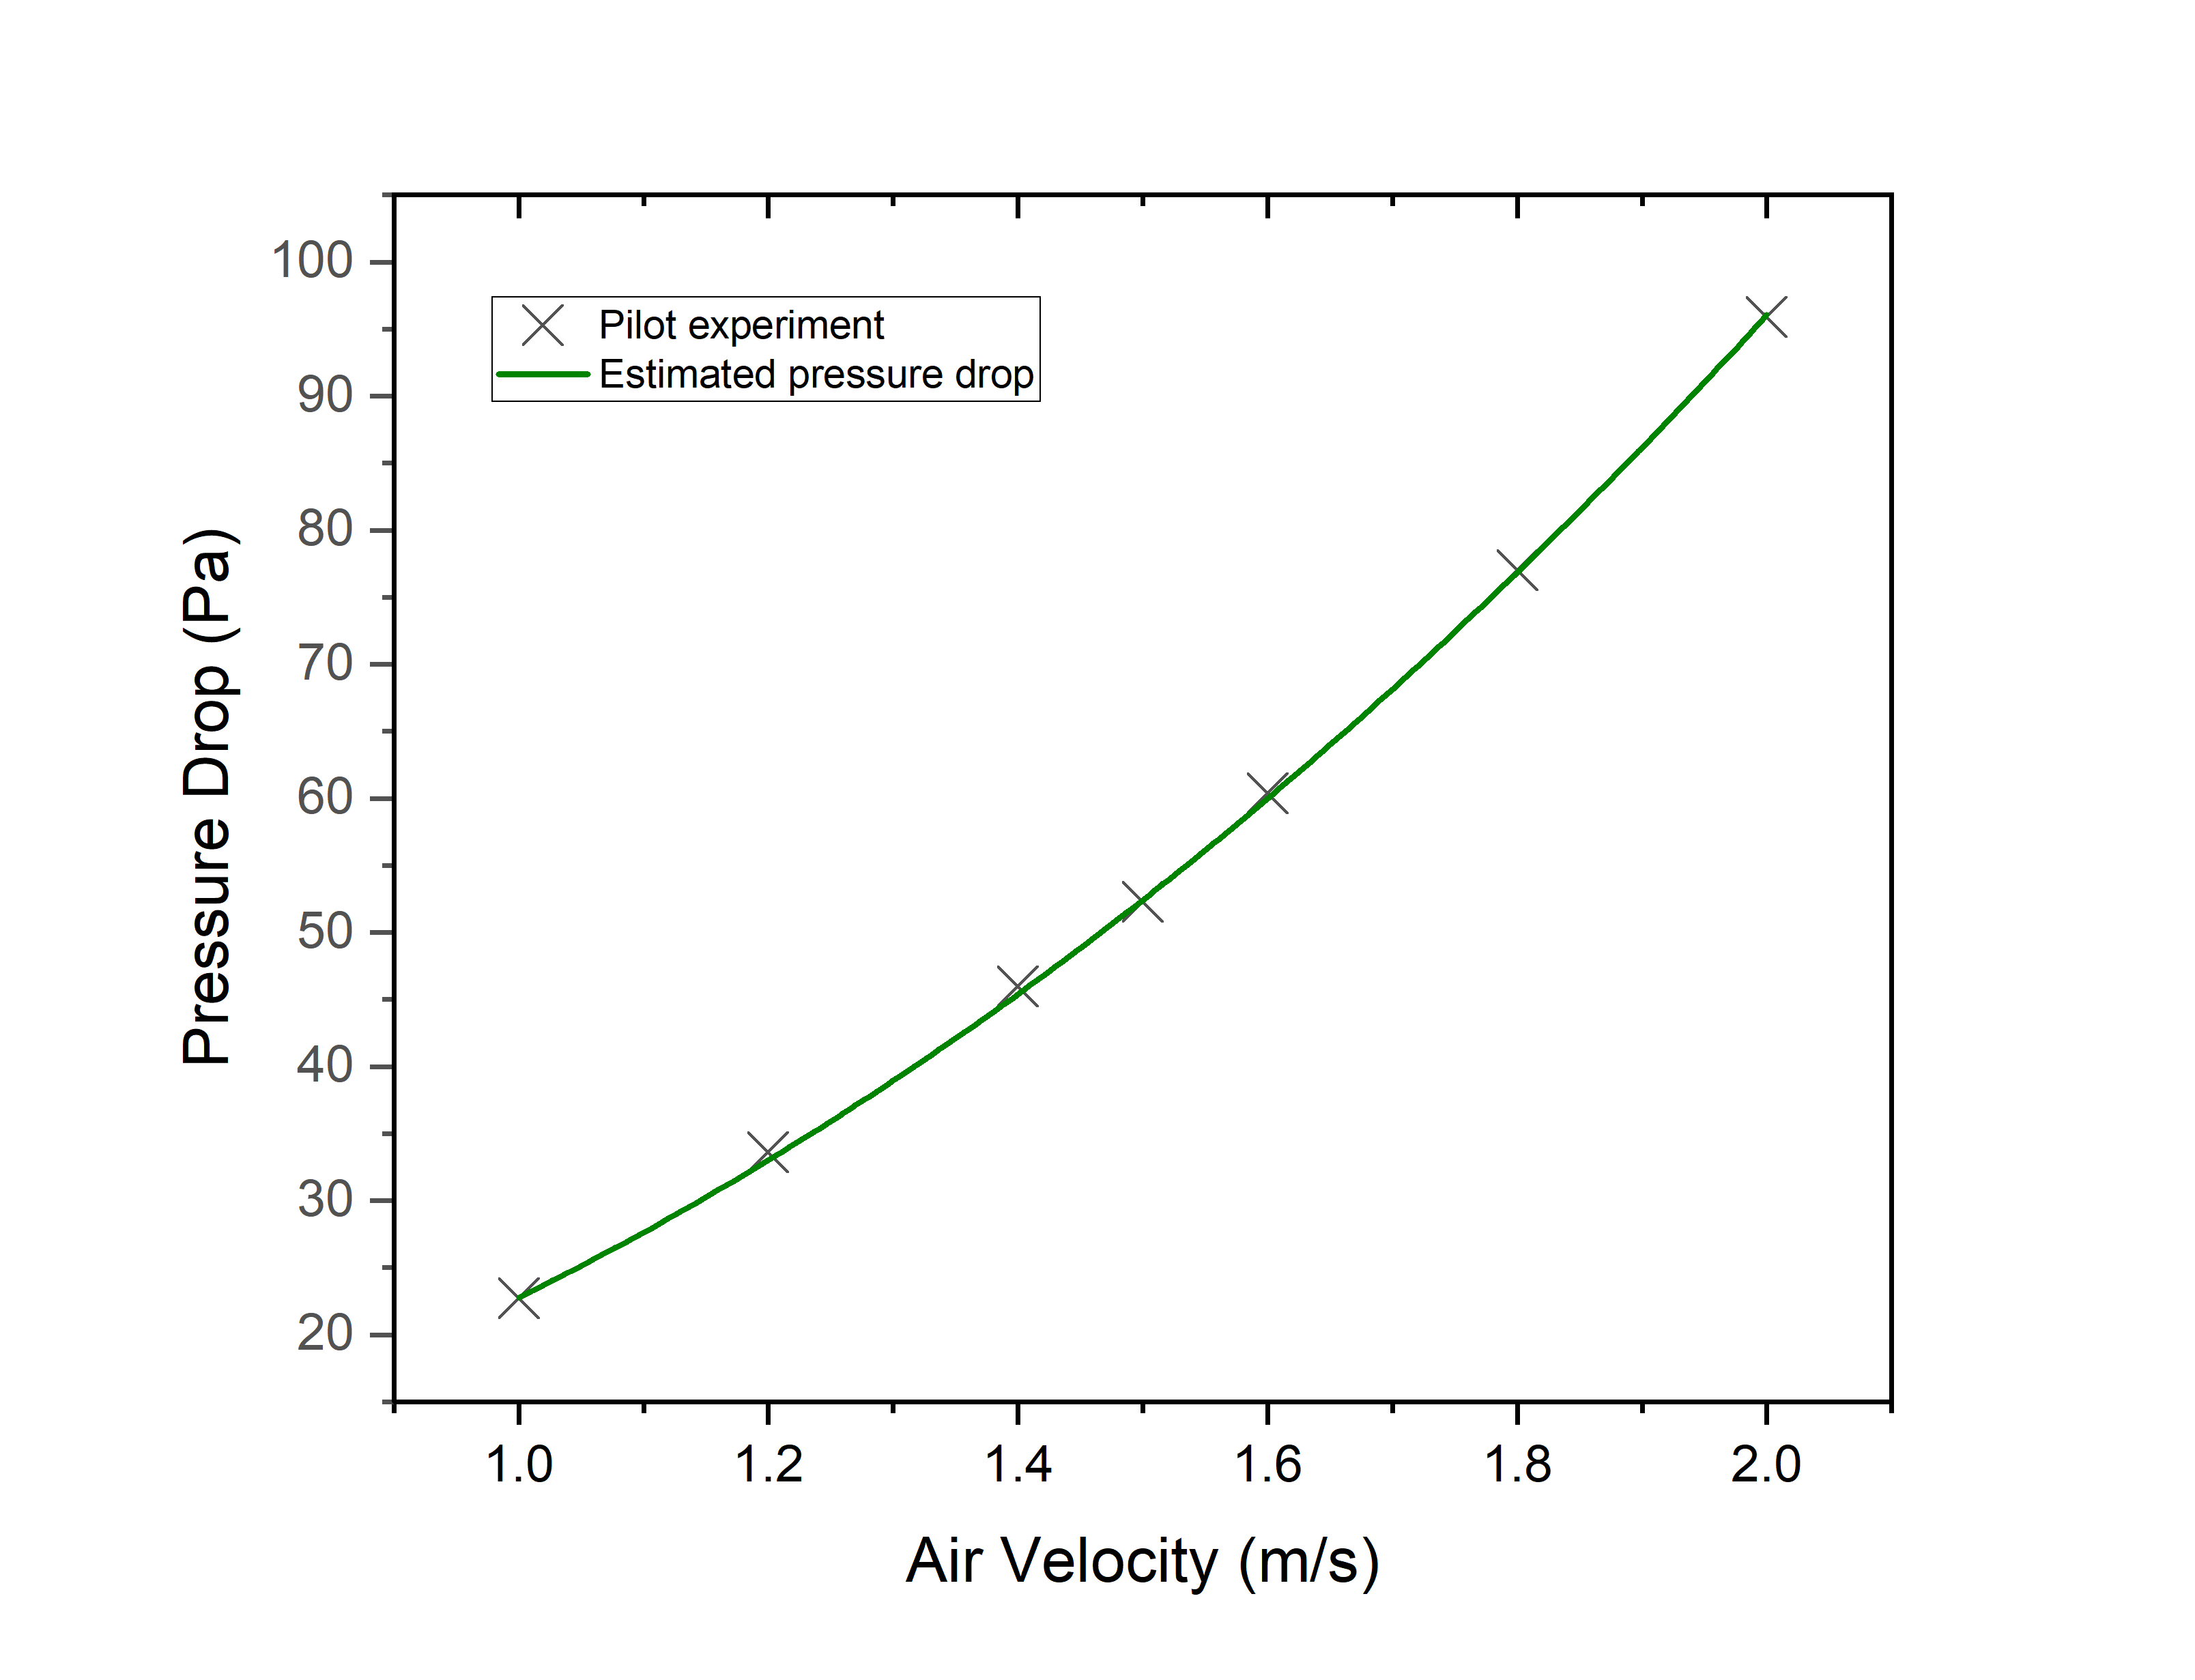


Figure S1: Validation of Brentwood XF12560 packing pressure drop curve under 3 m ATD.

**Calculation of fan electricity:**

Electricity consumption for the fan is derived from Holmes and Keith7:

Where, is the electricity consumption of the fan (kW)

A is the total cross-sectional area of the air contactor (m2) and the value is 40,000 m2for a commercial-scale air contactor.

is the fan energy efficiency (%) and 70% fan efficiency is assumed

**Calculation of pumping electricity:**

The pumping electricity is determined by loading rate, fluidization velocity and pumping efficiency. Here, we assumed the same fluidization velocity (0.6 L/m2s) and the same pumping efficiency (82%) from Carbon Engineering’s DAC design2. Therefore, the difference in pumping electricity consumption is calculated based on different loading rates according to mechanical energy requirements for the pumps8.

Table S4: Specifications of unit operations

| **Parameter** | **Value** | **Source** |
| --- | --- | --- |
| **Air Contactor** | | |
| Number of banks | 10 | Holmes et al. (2013)9 |
| Number of air contactor units in each bank | 160 |
| Number of blocks in each air contactor unit | 6 | Sabatino et al. (2021)1 |
| Number of stages per block | 20 |
| Diameter | 5.64 m |
| Height | 1.16 m |
| Packing | Modified Sulzer 250Y PVC (representing Brentwood XF12560 packing) | Holmes (2010)3 |
| Solvent recovery rate | 99.93% | Madhu et al. (2021)10 |
| Operating temperature | 21 ℃ | Sabatino et al. (2021)1 |
| Operating pressure | 1 bar |
| **Pellet Reactor** | | |
| Operating temperature | 21 ℃ | Sabatino et al. (2021)1 |
| Operating pressure | 1 bar |
| Calcium retention | 90% | Keith et al. (2018)2 |
| **Steam Slaker** | | |
| Pellet water carryover | 11.7 wt% | Adapted from process mass balance |
| Operating temperature | 300 ℃ | Keith et al. (2018)2 |
| Operating pressure | 1 bar |
| CaO conversion | 85% |
| **Calciner** | | |
| Operating temperature | 900 ℃ | Keith et al. (2018)2 |
| Operating pressure | 1 bar |
| CaCO3 conversion | 98% |
| **CO2 Absorber** | | |
| Diameter | 7.5 m | Keith et al. (2018)2 |
| Height | 12 m |
| Packing | BERL Ceramic packing |


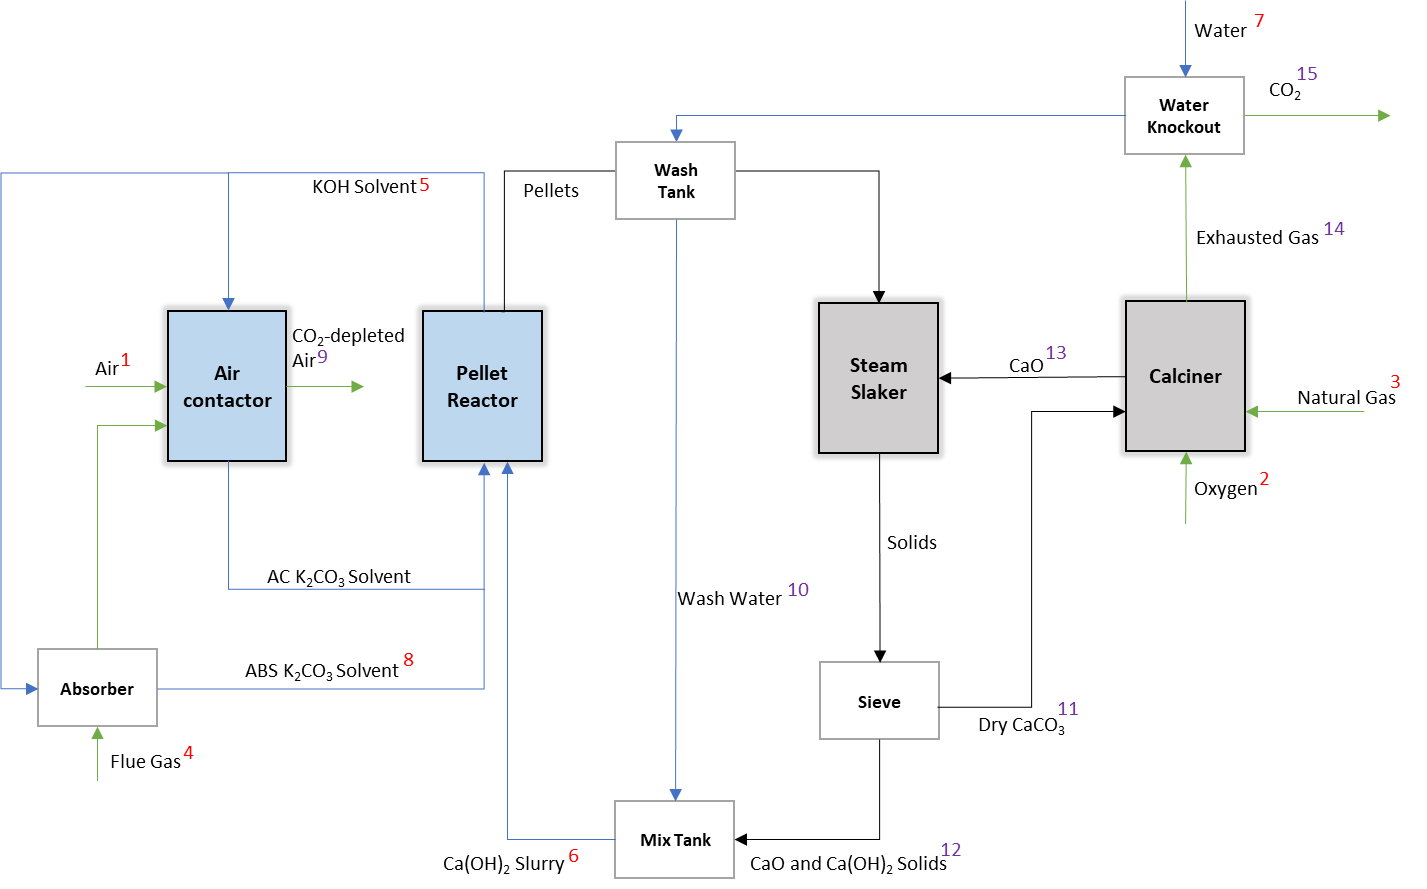


Figure S2: Block flow diagram of Carbon Engineering’s DAC process developed by Keith et al. to which our simulation is compared. The green arrow line lines represent gaseous streams, the blue arrow lines represent liquid streams, and the black arrow lines represent solid streams. The streams numbered 1-8 in red are the input streams, while the streams numbered 9-15 in purple are the outputs from the simulation to which our results are compared.

Table S5: Inputs into the DAC process model

| **Stream Number** | **Stream ID** | **Parameters** | **Value** |
| --- | --- | --- | --- |
| 1 | Air | Temperature (℃) | 21 |
| Flow rate (kt/hr) | 251 |
| CO2 (wt%) | 0.06 |
| O2 (wt%) | 23.00 |
| N2 (wt%) | 75.96 |
| H2O (wt%) | 0.98 |
| 2 | Oxygen | Temperature (℃) | 21 |
| Flow rate (t/hr) | 58.5 |
| O2 (wt%) | 95.60 |
| N2 (wt%) | 4.4 |
| 3 | Natural Gas | Temperature (℃) | 21 |
| Flow rate (kt/hr) | 13.4 |
| 4 | Flue Gas | Temperature (℃) | 40 |
| Flow rate (kt/hr) | 121 |
| CO2 (wt%) | 14.43 |
| O2 (wt%) | 0.91 |
| N2 (wt%) | 72 |
| H2O (wt%) | 12.66 |
| 5 | KOH Solvent | Temperature (℃) | 21 |
| Flow rate (kt/hr) | 35 |
| K+ (mol/L) | 2 |
| OH- (mol/L) | 1.1 |
| CO32- (mol/L) | 0.45 |
| 6 | Ca(OH)2 Slurry | Temperature (℃) | 21 |
| Flow rate (t/hr) | 777 |
| Ca(OH)2 (wt%) | 28.7 |
| 7 | Water | Temperature (℃) | 21 |
| Flow rate (t/hr) | 531 |
| 8 | ABS K2CO3 Solvent | Temperature (℃) | 31 |
| Flow rate (t/hr) | 3200 |
| K+ (mol/L) | 2.01 |
| OH- (mol/L) | 0.68 |
| CO32- (mol/L) | 0.66 |

Table S6: Model stream results and comparison with stream results from the Carbon Engineering’s DAC process

| **Stream ID** | **Name** | **Parameters** | **Carbon Engineering’s DAC process** | **Simulation results** | **Relative error (%)** |
| --- | --- | --- | --- | --- | --- |
| 9 | CO2-depleted Air | Temperature (℃) | 19 | 18.47 | -2.79 |
| Flow rate (kt/hr) | 252 | 251.55 | -0.18 |
| CO2 (wt%) | 0.016 | 0.01542 | -3.63 |
| O2 (wt%) | 22.96 | 22.95 | -0.04 |
| N2 (wt%) | 75.83 | 75.8295 | 0 |
| H2O (wt%) | 1.2 | 1.2 | 0 |
| 10 | Wash Water | Temperature (℃) | NA | 54 | NA |
| Flow rate (t/hr) | 567 | 566.998 | 0 |
| K+ (kg/hr) | 3089 | 3080 | -0.29 |
| OH- (kg/hr) | 768 | 740 | -3.65 |
| CO32- (kg/hr) | 1016 | 1062 | 4.53 |
| 11 | Dry CaCO3 | Temperature (℃) | 300 | 300 | 0 |
| Flow rate (t/hr) | 300 | 300.58 | 0.19 |
| 12 | CaO and Ca(OH)2 Solids | Temperature (℃) | 300 | 300 | 0 |
| Flow rate (t/hr) | 211 | 210.11 | -0.42 |
| CaO (t/hr) | 24.7 | 24.76 | 0.24 |
| Ca(OH)2 (t/hr) | 186 | 185.35 | -0.35 |
| 13 | CaO | Temperature (℃) | 674 | 674 | 0 |
| Flow rate (t/hr) | 165 | 165.04 | 0.02 |
| 14 | Exhausted Gas | Temperature (℃) | 454 | 450 | -0.88 |
| Flow rate (t/hr) | 201 | 201.41 | 0.20 |
| CO2 (wt%) | 82.57 | 82.553 | -0.02 |
| O2 (wt%) | 1.16 | 1.227 | 5.78 |
| N2 (wt%) | 1.28 | 1.278 | -0.16 |
| H2O (wt%) | 14.99 | 14.942 | -0.32 |
| 15 | CO2 | Flow rate (t/hr) | 171 | 171.33 | 0.19 |
| CO2 (wt%) | 97.12 | 97.046 | -0.08 |
| O2 (wt%) | 1.36 | 1.442 | 6.03 |
| N2 (wt%) | 1.51 | 1.502 | -0.53 |
| H2O (wt%) | 0.01 | 0.0098 | -2.00 |

Table S7: Model unit performance and comparison with unit performance from Carbon Engineering’s DAC process

| **Parameter** | **Carbon Engineering’s DAC process** | **Simulation results** | **Relative error (%)** |
| --- | --- | --- | --- |
| **Air Contactor** | | | |
| CO2 captured level (%) | 74.5 | 74.54a | 0.05 |
| Pumping energy (kWh/t CO2) | 21 | 20.9b | 0.13 |
| Fan energy (kWh/t CO2) | 61 | 61.2c | 0.56 |
| **Pellet Reactor** | | | |
| Ca2+ to CaCO3 conversion (%) | 100d | 100 | 0 |
| Discharged pellets (%) | ~90 | 90 | 0 |
| Pumping energy (kWh/t CO2) | 27 | 26.9b | 0.14 |
| **Steam Slaker** | | | |
| CaO conversion (%) | 85 | 85 | 0 |
| Slaking heat (kJ/mol) | 105.2e | 105.03f | -0.16 |
| **Calciner** | | | |
| CaCO3 conversion (%) | 98 | 98 | 0 |
| Thermal energy consumption (GJ/t CO2) | 5.25 | 5.23f | -0.44 |
| **CO2 absorber** | | | |
| CO2 absorber capture level (%) | 90 | 89.99a | -0.01 |

aObtained from rate-based absorption model

bCalculated from the liquid flow rate (82% pump efficiency2)

cCalculated from fan energy equation (70% fan efficiency2)

dCa2+ as a limiting reagent mentioned in Keith et al. (2018)2

eObtained from Carbon Engineering’s patent11

fAspen Plus® simulation results

## Note S2: Modelling, simulation and validation of solar calciner at pilot scale.

This pilot-scale solar reactor is a four-stage fluidized bed fluidized by air from the bottom and particles cross-flow from the first stage to the fourth stage. The solar reactor is 1 m long and contains 4 compartments each 25 cm long, 8 cm wide and separated from each other by 40 cm high baffles. The solar reactor can process 40 kg particles at 0.5 void fraction. The experiments showed the highest conversion at 95.2% which was conducted at 20 kg/h particles and a high air fluidization flow rate of 30 Nm3/h. In this case, the highest thermochemical efficiency (17%) and highest thermal efficiency (29%) were achieved.

**
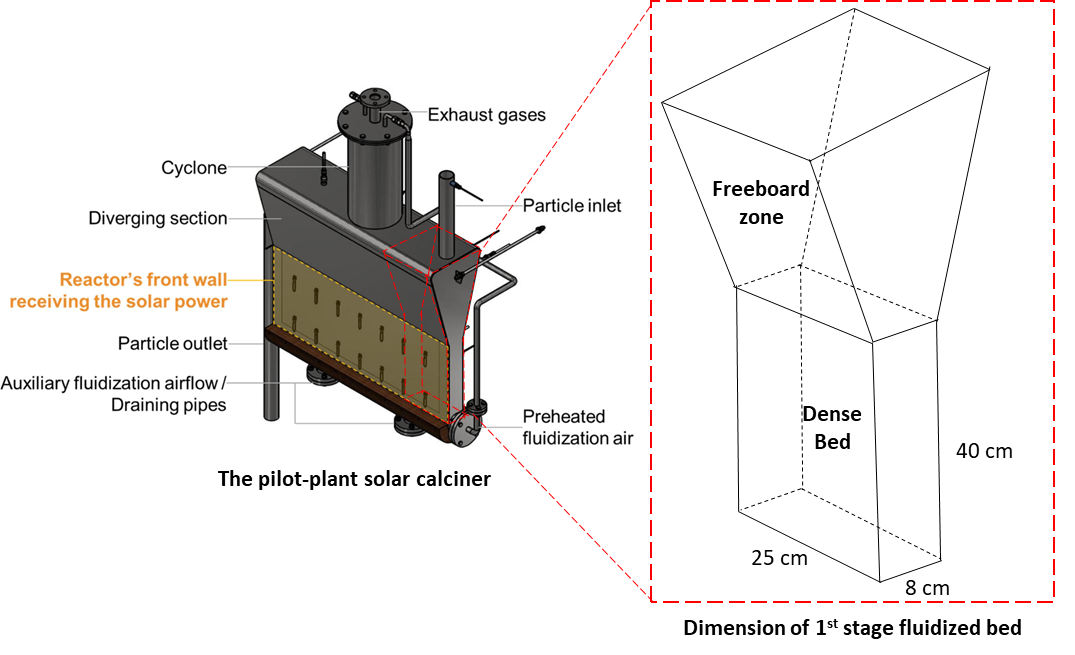
**

Figure S3: Schematic diagram of the pilot-scale solar reactor and the dimension of 1st stage fluidized bed

**Assumptions**

- The solar calciner is modelled at steady-state.
- The operating temperature represents the mean reactor temperature.
- The hydrodynamics of the fluidized bed are only considered on the height axis.

**Modelling and simulation**

To reproduce the four-stage horizontal fluidized bed used for solar calcination, the solar reactor was modelled and simulated in four fluidised beds arranged in series, as represented in the following Figure. The process flowsheet of this new modelling design was conducted in Aspen Plus® V11. Aspen Custom Modeller® (ACM) V11 acted as an additional calculation block in this flowsheet to correct the steam enthalpy and calculate the thermal efficiency.


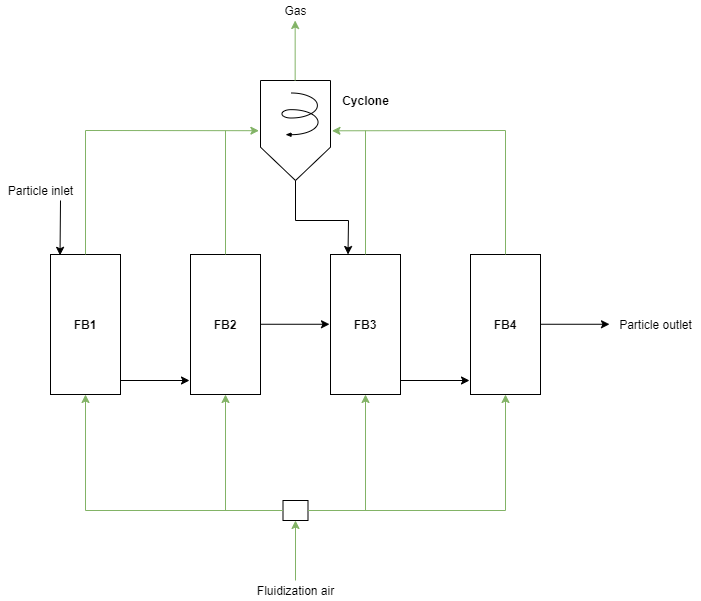


Figure S4: Representation of the approach adopted to model the four-stage horizontal solar fluidized bed (FB: fluidized bed)

Table S8: Specification of fluidized bed

| **Bed geometry** | |
| --- | --- |
| Bed number | 4 |
| Width | 25 cm |
| Depth | 8 cm |
| Height (dense bed height) | 40 cm |
| 1st stage solid discharge location | 5 cm |
| 2nd stage solid discharge location | 30 cm |
| 3rd stage solid discharge location | 5 cm |
| 4th stage solid discharge location | 40 cm |
| **Bed inventory** | |
| Voidage at minimum fluidization | 0.5 |
| Geldart classification | Geldart A |
| **Other model settings** | |
| Minimum fluidization velocity correlation | Wen & Yu (1966) |
| Transport disengagement height | Fung and Hamdullahpur (1993) |
| Elutriation | Tasirin & Geldart (1998) |

Table S9: Enthalpy correlation and thermal efficiency calculation

| **Parameter** | **Reference** |
| --- | --- |
| Heat of reaction | Robie and Hemingway, 199512 |
| Enthalpy of CaCO3 | Robie and Hemingway, 199512 |
| Enthalpy of Air | Hilsenrath et al., 195513 |
| Thermochemical efficiency | Esence et al., 202014 |
| Thermal efficiency | Esence et al., 202014 |

Table S10: Process specifications of solar calcination process at pilot scal**e**

| **Parameter** | **Case 1:**  **20 kg/hr low**  **fluidization flow rate** | **Case 2:**  **20 kg/hr high**  **fluidization flow rate** |
| --- | --- | --- |
| Mass flow rate of CaCO3 (kg/hr) | 20 | 20 |
| Air flow rate (Nm3/hr) | 10.1 | 19.3 |
| Auxiliary air (Nm3/hr) | 3 | 4 |
| Global temperature in calcinera (℃) | 831 | 813 |
| Solar power in (kW) | 67.4 | 57.8 |
| Inlet CaCO3 purityb (wt%) | 98.5% | 98.5% |

aGlobal temperature represents the reactor temperature in each specific case.

bOther impurities include 0.085% CaO and 0.065% unreactive materials such as SiO, MgO, and MnO.

Table S11: Validation of two representative experimental data of solar calcination

|  | **Case 1:**  **20 kg/hr low fluidization flow rate** | | | **Case 2:**  **20 kg/hr high fluidization flow rate** | | |
| --- | --- | --- | --- | --- | --- | --- |
|  | **Experimental data** | **Simulation result** | **Relative Errors** | **Experimental data** | **Simulation result** | **Relative Errors** |
| **Mass balance** | | | | | | |
| CaCO3 conversion | 88.50% | 88.57% | -0.08% | 95.20% | 95.43% | -0.24% |
| CaCO3 weight fraction in solids outlet | 18.60% | 18.26% | 1.80% | 7.62% | 7.68% | -0.75% |
| CaO weight fraction in solids outlet | 80.65% | 80.92% | -0.34% | 91.24% | 91.22% | 0.03% |
| Unreactive materials weight fraction in solids outlet | 0.75% | 0.81% | -8.16% | 1.14% | 1.11% | 2.81% |
| **Energy balance** | | | | | | |
| Thermochemical efficiency | 14% | 13.62% | 2.70% | 17% | 17.10% | -0.60% |
| Thermal efficiency | 23% | 23.42% | -1.85% | 29% | 29.13% | -0.46% |

## Note S3: Modelling, simulation and validation of CO2-to-SAF at lab scale

**Assumptions**

The following assumptions were made for the CO2 utilisation model using the CO2-FTS approach.

- This model, which transforms CO2 into jet fuel, operates at steady-state. Hence, there is no accumulation of heat and mass in the fixed bed reactor.
- Only reaction conversion and specific products are considered based on material balance and stoichiometric reactions.
- Only olefin and paraffin are considered for hydrocarbons in this model (depending on the catalyst nature, the selectivity of oxygenates was neglected in experiments due to it being below 1.0%), and the ratio of olefin to paraffin for each hydrocarbon is obtained from jet fuel experiments15,16.
- The chain growth probability of hydrocarbons is based on the given Anderson-Schulz-Flory (ASF) plot from experiments15.
- The lumping technique was used for a large number of products from CO2-FTS reactions. The infinite number of hydrocarbon components is handled by the lump of components from C1 to C50.

**Modelling and simulation of the CO2-FTS process**

A modified ASF model combining ASF theory and kinetic modelling on the Fischer-Tropsch reaction was implemented in ACM to predict the hydrocarbon distribution of converting CO to jet fuel under Fe-Mn-K catalyst in the carbon number range from C1 to C50.

C3 compounds do not follow the theoretical ASF distribution and are removed from the modified ASF model. The chain growth probability is calculated separately based on the kinetic values proposed by Kamkeng and Wang17.

Based on the predicted selectivity of products in ACM, the mass and energy balance of the CO2-FTS process using the lumping technique was simulated in Aspen Plus® V11.

Table S12: Equations of CO2-FTS model implemented in ACM

| **Parameter** | **Equation** | **Reference** |
| --- | --- | --- |
| Chain growth probability of C3 () |  | Kamkeng and Wang (2023)17, Todic et al. (2013)18 |
| Weight fraction of C3 () |  |  |
| Product fraction related to() |  | Kamkeng and Wang (2023)17 |
| Product fraction related to () |  |  |
| Weight fraction of hydrocarbon n () |  | Donnelly et al. (1988)19 |
| Average molecular weight of hydrocarbons () |  | Kamkeng and Wang (2023)17 |
| Mole fraction of hydrocarbon n () |  |  |
| Selectivity of hydrocarbon n () |  |  |
| Total molar flow rate of hydrocarbons () |  |  |
| Molar flow rate of hydrocarbon n () |  |  |

Table S13: Products and chemical reactions implemented for the CO2-FTS model

| **Carbon range** | **Product category** | **Carbon number** | **Component** | **Chemical reaction** |
| --- | --- | --- | --- | --- |
| n=1 | Carbon Monoxide | 1 |  |  |
| Methane |  |  |
|  | Light Hydrocarbon (C2-C4) | 2, 3 and 4 |  |  |
|  |  |
|  |  |
|  |  |
|  |  |
|  |  |
|  | Light Naphtha (C5-C7) | 5, 6 and 7 |  |  |
|  |  |
|  |  |
|  |  |
|  |  |
|  |  |
|  | Jet Fuel (C8-C16) | 12 |  |  |
|  |  |
|  | Wax (C17+) | 20 |  |  |

Table S14: Input parameters for CO2-FTS model validation

| **Parameter** | | **Value** | **Reference** |
| --- | --- | --- | --- |
| Reactor type | | fixed bed | Yao et al. (2020)15 |
| Reactor diameter (cm) | | 1 |
| Reactor temperature (℃) | | 300 |
| Reactor pressure (MPa) | | 1 |
| H2/CO2 ratio | | 3 |
| Flow rate (mL/min) | | 40 |
| CO2 conversion (%) | | 38.2 |
| Chain growth probability |  | 0.79 | Donnelly et al. (1988)19, Yao et al. (2020)15 |
|  | 0.572 |
| Carbon number at breakpoint | | 12 |
| Kinetic constants | k1 | 1.6610-2 | Kamkeng and Wang (2023)17, Todic et al. (2013)18 |
| k5 | 6.99 10-5 |
| K6,0 | 2.02 10-2 |
| Constant c | | -0.26 |
| Fitting parameter |  |  |
|  |  |
|  |  |

Table S15: Model validation results of selectivity for different product categories

| **Product category** | **Selectivity (%)** | | **Relative error (%)** |
| --- | --- | --- | --- |
| Experimental data | Model prediction |
| **CO** | 5.6 | 5.60 | 0.00 |
| **C1** | 10.4 | 10.14 | -2.51 |
| **C2-C4** | 27.7 | 27.60 | -0.34 |
| **C5+** | 61.9 | 62.26 | 0.58 |
| **C8-C16** | 47.8 | 47.64 | -0.34 |


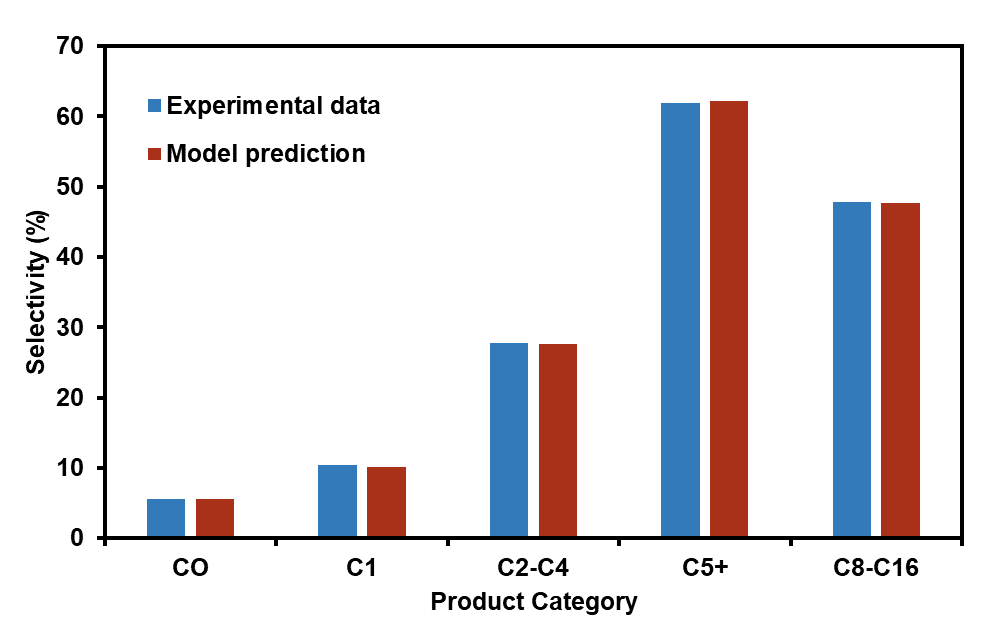


Figure S5: Model predictions and experimental values of CO2-FTS product selectivity


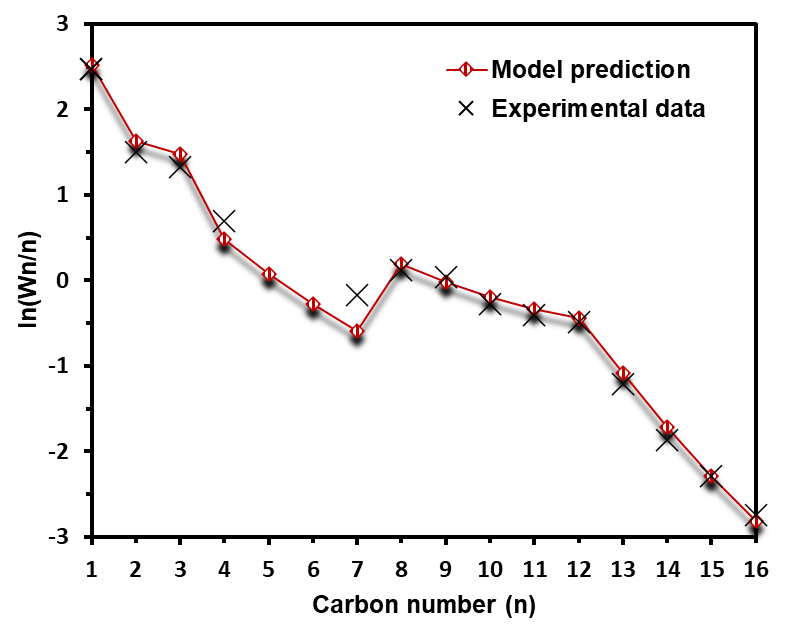


Figure S6: Anderson-Schulz-Flory plots showing the prediction of hydrocarbon distributions

## Note S4: Scale-up approach of fluidized bed

Kelkar and Ng studied the scale-up of fluidized beds with the consideration of both hydrodynamic similarity and reaction converion20. Based on the scaling law, the bubble size of the fluidized bed is controlled in a suitable range to achieve the same reaction conversion at a large scale.


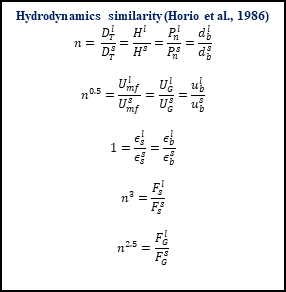


Figure S7: Scale-up principle of solar calciner for achieving hydrodynamic similarity

With the commercial-scale solar calciner, we can achieve the large-scale CSP-driven DAC. The reactor geometry and operation parameters will be based on operating and economic optimisation.

**
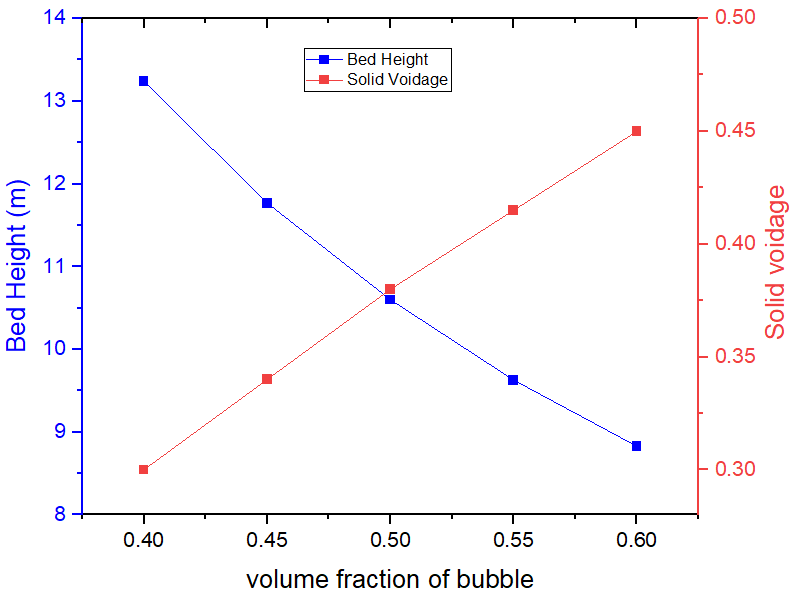
**

Figure S8: Bed height and solid voidage as a function of bubble volume fraction at large-scale


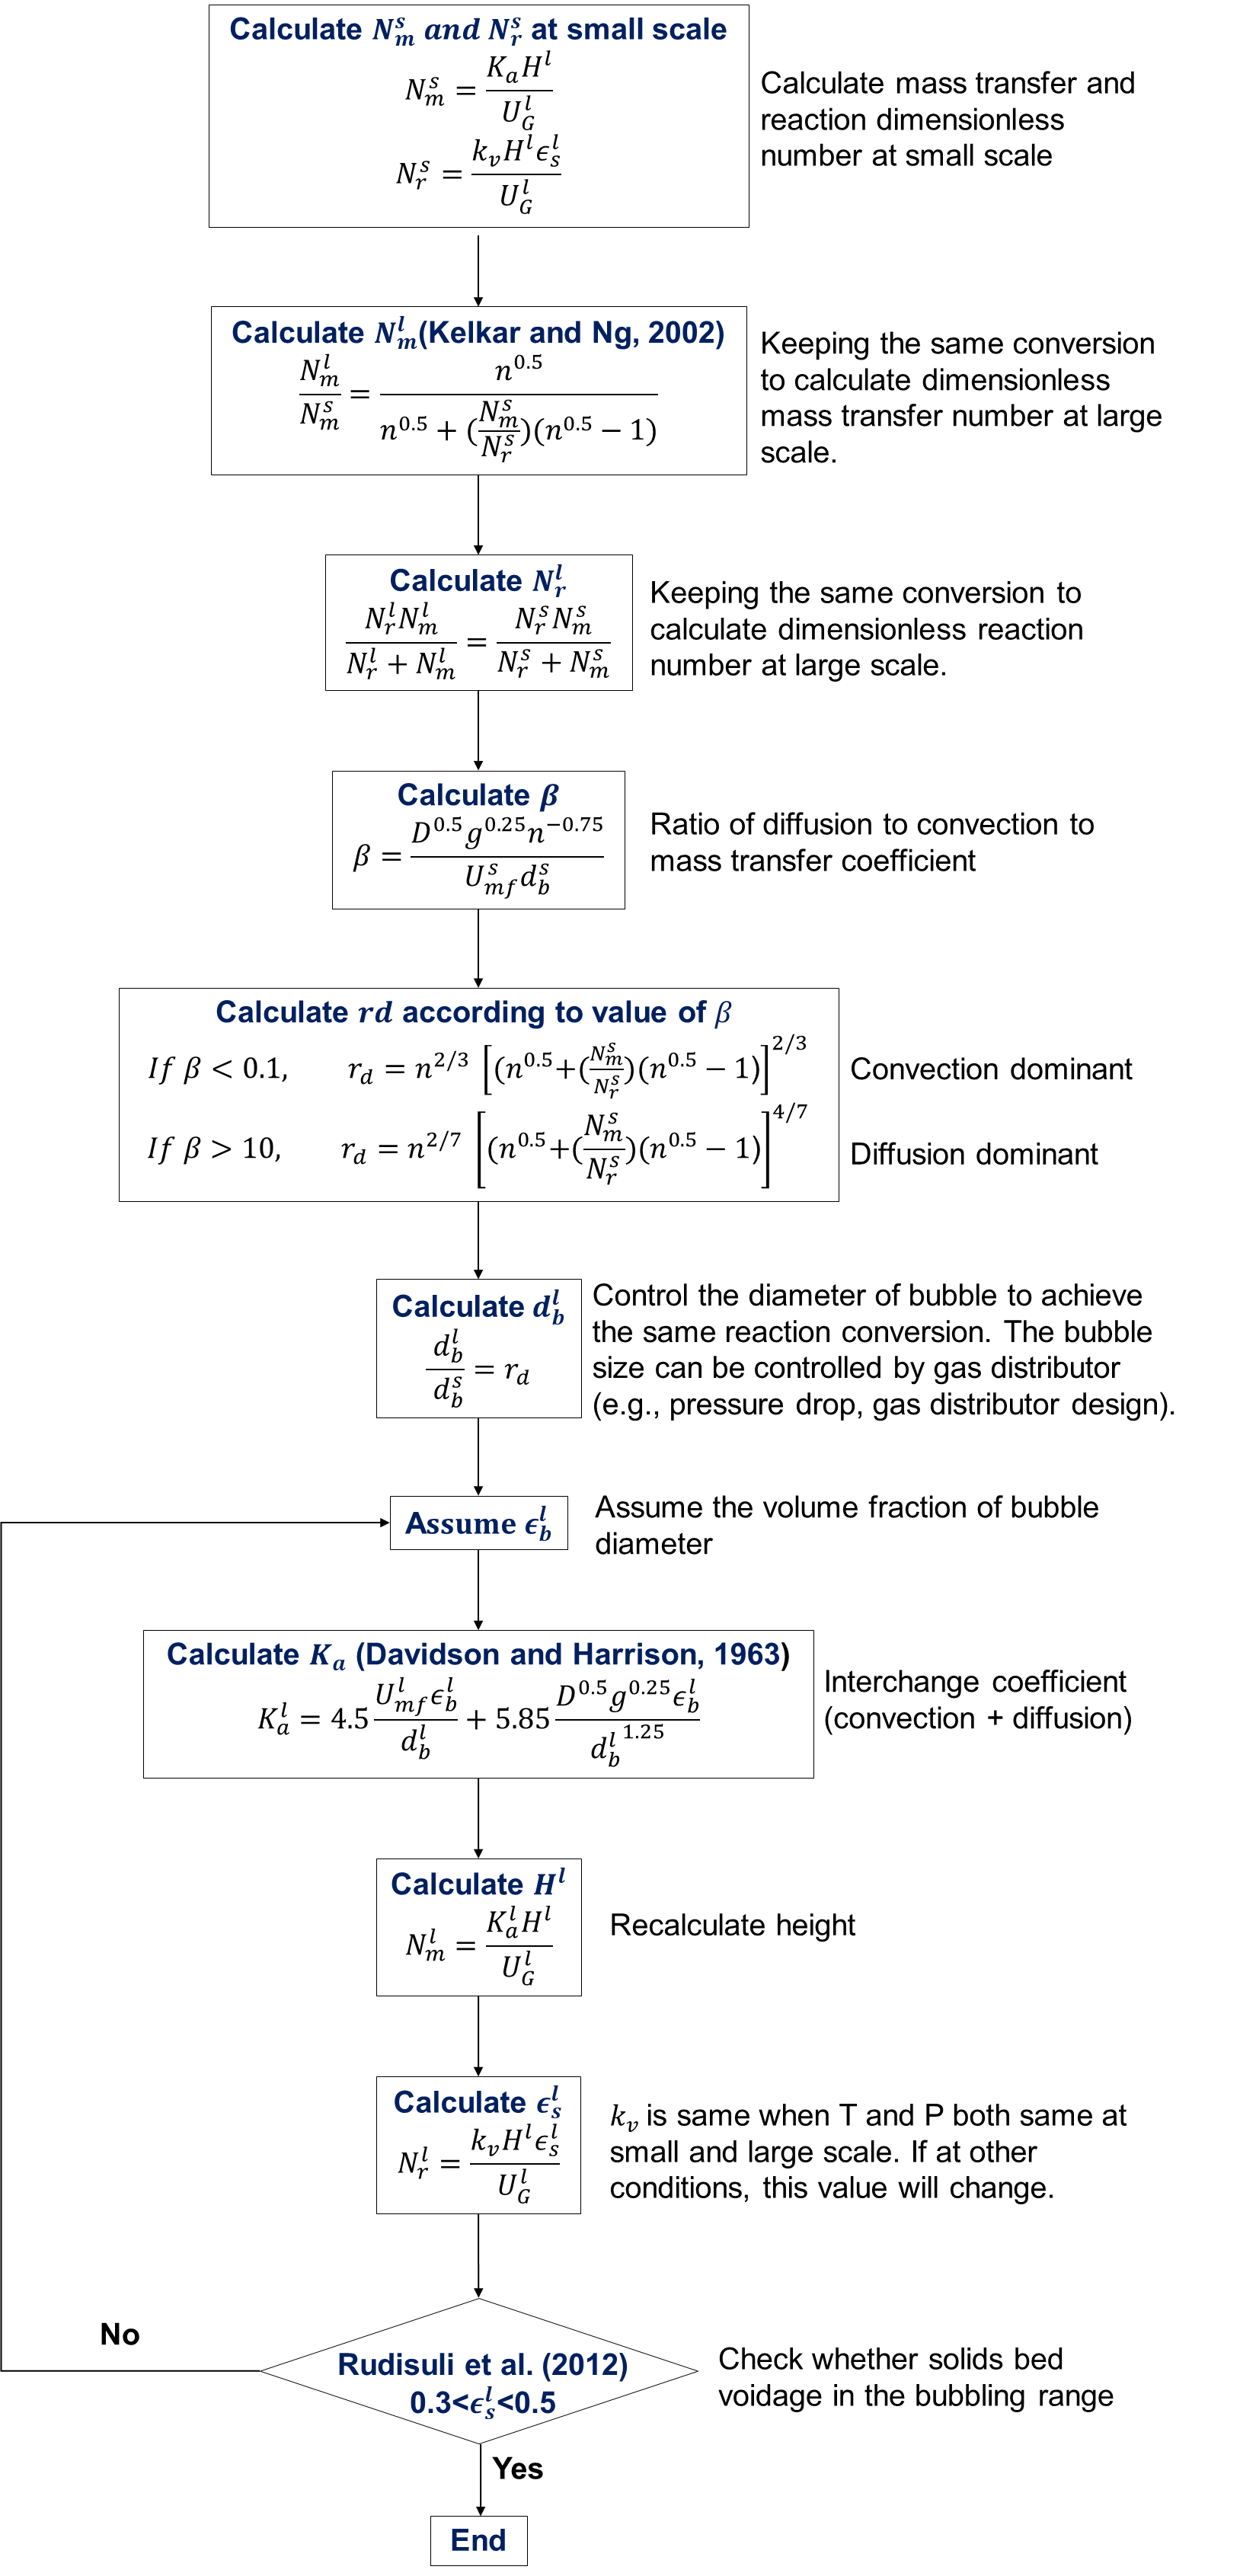

Figure S9: Scale-up principle of solar calciner for achieving the same reaction conversion

Table S16: Example of large-scale hydrogen-based solar calciner through scaling approach

| **Symbol** | **Description** | **Unit** | **Pilot-scale (Air)** | **Pilot-scale (H2)** | **Commercial-scale (H2)** |
| --- | --- | --- | --- | --- | --- |
| n | scaling factor |  | 1 | | 10 |
| ***Reactor Geometry and Phase Flows*** | | | | | |
| L | Length | m | 0.08 | 0.08 | 0.8 |
| W | Width | m | 0.25 | 0.25 | 2.5 |
| H | Height | m | 0.8 | 0.8 | 10.73 |
| FS | Solids flow rate | kg/h | 20 | 20 | 20,000 |
| FG | Gas flow rate | kg/h | 30 | 2.077 | 656.8 |
| Umf | Minimum fluidization velocity | mm/s | 4 | 8.1 | 25.5 |
| UG | Superficial fluidization velocity | m/s | 0.4 | 0.404 | 1.28 |
| ub | Bubble velocity | m/s | 0.95 | 0.94 | 2.97 |
| ***Phase distribution*** | | | | | |
| dp | Mean particle diameter | μm | 100 | 100 | 178 |
| db | Bubble diameter | m | 0.053 | 0.05 | 0.7 |
| εb | Volume fraction of bubble | - | 0.415 | 0.42 | 0.5 |
| εs | Voidage of solids | - | 0.5 | 0.5 | 0.37 |
| ***Transport attributes*** | | | | | |
| Ka | Interchange coefficient | s-1 | 0.64 | 0.01 | 0.69 |
| ***Dimensionless No. and Reactor Performance*** | | | | | |
| Nr | Reaction numbers | - | 1.28 | 1.49 | 4.69 |
| Nm | Mass transfer numbers | - | 0.1 | 1.37 | 0.84 |
| XCaCO3 | CaCO3 conversion | - | 0.95 | 0.95 | 0.95 |

## Note S5: Techno-economic assessment at the base case scenario

Table S17: Equipment installed cost breakdown by section (base case)

| **Equipment type** | **Installation factor** | **Scaling exponent** | **Reference installed cost (US$)** | **Installed cost (2020 US$)** | **Source** |
| --- | --- | --- | --- | --- | --- |
| **Direct air capturea** | | | | | |
| Air contactor | 1.86 | 1 | 212,200,000 | 233,549,271 | 2 |
| Pellet reactor | 1.7 | 0.675 | 130,700,000 | 133,967,959 | 2 |
| Steam slaker | 1.45 | 0.675 | 38,850,000 | 37,606,988 | 2 |
| Steam turbine | NA | 0.7 | 7,510,000 | 8,265,575 | 2 |
| Filter | 1.76 | NA | 30,900,000 | 31,840,017 | 2 |
| Other equipmentb | NA | NA | 102,900,000 | 89,045,962 | 2,21 |
| Buildings | NA | 0.61 | 6,700,000 | 6,566,310 | 2 |
| Transformer | NA | 0.7 | 19,800,000 | 19,075,577 | 2 |
| Subtotal | | | | 559,917,659 |  |
| **Solar calcination** | | | | | |
| Heliostat fieldc | NA | 1 | NA | 126,688,860 | 22 |
| Parabolic mirrord | 2.27 | 1 | NA | 38,006,658 | 22 |
| Solar calciner & solar towere | 2.27 | 0.48 | NA | 211,679,219 | 21 |
| CaCO3 storage tankf | NA | NA | NA | 1,556,530 | 21 |
| CaO storage tankf | NA | NA | NA | 1,006,128 | 21 |
| Subtotal | | | | 378,937,395 |  |
| **CO2-to-SAF** | | | | | |
| Mixed gas cooler | 3.23 | 0.7 | 4,186,906 | 6,414,481 | 23 |
| Mixed gas compressor | 2.47 | 0.65 | 11,461,600 | 56,825,619 | 23 |
| H2 compressor | 2.47 | 0.6 | 2,547,995 | 1,108,176 | 23 |
| Preheater | 2.47 | 0.6 | 6,248,204 | 14,770,241 | 23 |
| CO2-FTS reactor | 2.75 | 0.8 | 36,681,585 | 262,237,754 | 23 |
| Syncrude cooler | 1.52 | 0.7 | 50,244 | 1,455,142 | 23 |
| Three-phase separator | 1.69 | 0.7 | 6,595,713 | 17,995,594 | 23 |
| Distillation unitg | 2.47 | 0.65 | 2,547,995 | 74,788,647 | 23,24 |
| Subtotal | | | | 435,596,192 |  |

aEquipment of DAC is quoted from CE’s DAC design and updated based on size and cost to 2020

bOther equipment is assumed to be 20% of the cost for the rest of the process equipment, including cyclones, mix tank and auxiliary equipment

cHeilostat field cost is according to US$75/m2

dParabolic mirror cost is assumed as 30% of the heliostat field cost

eSolar receiver and tower were calculated together

fCost of storage tanks were calculated according to the reference method21

gDistillation unit is assumed as a holistic cost including jet fuel distillation, separator and co-product recovery system (distillation columns, compressors, heaters and coolers)


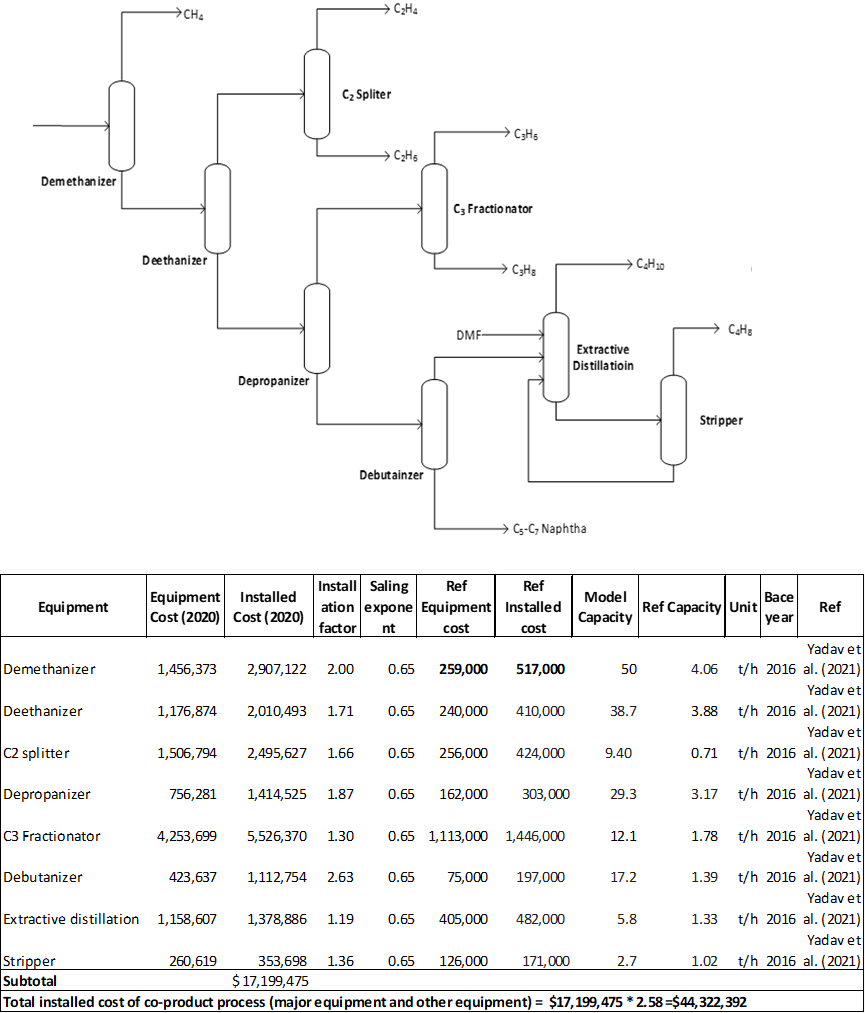


Figure S10: Design and cost of co-product recovery system

While the co-product recovery is illustrated as a single block in Extended Data Fig. 4, for clarity, this unit consists of multiple components, including distillation columns, compressors, heaters and coolers. Specifically, the process handles a stream of 55.8 t/h, which contains 10.1 wt% water, 69.3 wt% C1-C4 hydrocarbons and 20.4 wt% C5+ hydrocarbons. After water removal, the remaining hydrocarbons can be separated by conventional petroleum refinery processes—a mature and well-established industrial process. Here, the same separation process was adopted from previous study24 to recover high-purity (>99.5 wt%) fractions of CH4, C2H4, C2H6, C3H6, C3H8, C4H8, C4H10 and C5-C7 naphtha (see Figure S10). The total installed cost of the co-product recovery system is $44.3 million, which is around 59.3% of the distillation unit cost.

Table S18: CAPEX summary of 1 MtCO2/yr solar-driven DACCU plant by section (base case)

| **Parameter** | **Item** | **Calculation** | **Cost (2020 US$M)** |
| --- | --- | --- | --- |
| **method** |
| **Direct air capture** | | | |
| Total direct field costs (TDFC) | | Sum of the installed cost | 559.9 |
| Indirect field costs (IFC) | | 12.7% of TDFC | 71.1 |
| Total field costs (TFC) | | TDFC + IFC | 631.0 |
| Non-field costs (NFC) | Engineering | 12% of TPC | 108.4 |
| Contingency | 6% of TFC | 126.2 |
| Other project costs | 20% of TFC | 37.9 |
| Total non-field costs (TNFC) | | Sum of non-field costs | 272.5 |
| Total project costs (TPC) | | TFC + TNFC | 903.5 |
| **Solar calcination** | | | |
| TDFC | | Sum of the installed cost | 378.9 |
| Contingency | | 10% TDFC | 37.9 |
| Direct cost | | TDFC + Contingency | 416.8 |
| Indirect cost | | 9% TDFC | 34.1 |
| Total capital investment of CSP | | Direct cost + Indirect cost | 450.9 |
| **CO2-to-SAF** | | | |
| TDFC | | Sum of the installed cost | 435.6 |
| IFC | | 12.7% of TDFC | 55.3 |
| TFC | | TDFC + IFC | 490.9 |
| NFC | Engineering | 12% of TPC | 84.3 |
| Contingency | 6% of TFC | 98.2 |
| Other project costs | 20% of TFC | 29.5 |
| TNFC | | Sum of non-field costs | 212.0 |
| TPC | | TFC + TNFC | 702.9 |
| Land cost | | Average land cost | 21.1 |
| Total CAPEX | | 2,078.5 | |

Table S19: Annual operational expenditure breakdown (base case)

| **Operating Parameters** | | |
| --- | --- | --- |
| **Parameter** | **Value** | **Units** |
| Annual operating hours | 8,000 | hr/yr |
| CO2 concentration in the air | 420 | ppm |
| Air velocity | 1.4 | m/s |
| Air travel distance | 7 | m |
| CO2 capture rate | 74.5 | % |
| Annual CO2 capture productivity | 0.96 | Mt/yr |
| Annual SAF productivity | 0.12 | Mt/yr |
| **Variable Operating Costs** | | |
| **Raw material/Utility** | **Mass flow (kg/hr) or**  **Energy flow (kW)** | **Cost (US$/yr)** |
| KOH makeup | 907.7 | 5,446,008.0 |
| CaCO3 makeup | 2,717.0 | 4,347,200.0 |
| Water makeup | 516,110.0 | 4,128,880.0 |
| Fan electricity | 6,858.8 | 1,646,112.0 |
| Pumping electricity | 5,028.8 | 1,206,912.0 |
| Hydrogen for fluidization | 8,110.0 | 141,438,616.3 |
| Additional hydrogen | 8,300.5 | 144,760,503.7 |
| Hydrogen makeup | 912.7 | 15,917,413.0 |
| Catalyst makeupa | NA | 7,960,000.0 |
| Electricity | 30,283.9 | 7,268,124.8 |
| Heating utility | 58,849.6 | 14,123,896.0 |
| Cooling utility | 248,632.6 | 1,551,467.6 |
| **Potential Co-Products and Credits** | | |
| **Co-products** | **Mass flow (kg/hr)** | **Cost (US$/yr)** |
| NG | 3,768.9 | 7,839,382.5 |
| Ethane | 1,405.9 | 1,912,089.9 |
| Ethylene | 1,738.1 | 8,064,569.1 |
| Propane | 1,617.9 | 4,271,330.4 |
| Propylene | 2,399.7 | 15,934,192.2 |
| Butane | 1,044.0 | 3,006,589.9 |
| Butene | 913.8 | 9,284,373.8 |
| Light Naphtha | 3,573.2 | 10,862,405.1 |
| Subtotal | | 61,174,933.0 |
| **Fixed operating costs** | | |
| **Section** | **Calculation method** | **Cost (US$M/yr)** |
| DAC | 3% of CAPEX | 27.11 |
| CO2-to-SAF | 3% of CAPEX | 21.09 |
| Solar calcination | 3% of CAPEX | 13.53 |

aCatalyst consumption is assumed as 2 t/yr25

Table S20: Summary of annual operational expenditure (base case)

| **Process Section** | **Cost category (US$M/yr)** | | | | | | | |
| --- | --- | --- | --- | --- | --- | --- | --- | --- |
| Fixed cost | Sorbent | Water | Catalyst | Utility | Hydrogen | Co-products | Subtotal |
| DAC | 27.11 | 9.79 | 4.13 | - | 2.85 | - | - | 43.88 |
| Solar calcination | 13.53 | - | - | - | - | 141.44 | - | 154.97 |
| CO2-to-SAF | 21.09 | - | - | 7.96 | 22.94 | 160.68 | -61.17 | 151.49 |
| Subtotal | 61.72 | 9.79 | 4.13 | 7.96 | 25.80 | 302.12 | -61.17 | 350.34 |

Table S21: MSP of SAF at base case

| **Process Section** | **Cost category (US$/kg SAF)** | | | | | | | | | |
| --- | --- | --- | --- | --- | --- | --- | --- | --- | --- | --- |
| Fixed cost | Sorbent | Water | Catalyst | Utility | Hydrogen | Co-products | Capital charge | Land cost | Subtotal |
| DAC | 0.22 | 0.08 | 0.03 | - | 0.02 | - | - | 0.78 | - | 1.13 |
| Solar calcination | 0.11 | - | - | - | - | 1.15 | - | 0.39 | - | 1.64 |
| CO2-to-SAF | 0.17 | - | - | 0.06 | 0.19 | 1.30 | -0.50 | 0.60 | - | 1.83 |
| Subtotal | 0.50 | 0.08 | 0.03 | 0.06 | 0.21 | 2.45 | -0.50 | 1.77 | 0.02 | 4.62 |

Table S22: LCOD at base case

| **Process Section** | **Cost category (US$/t CO2)** | | | | | | | | | | |
| --- | --- | --- | --- | --- | --- | --- | --- | --- | --- | --- | --- |
| Fixed cost | Sorbent | Water | Catalyst | Utility | Hydrogen | Co-products | Capital charge | Land cost | SAF avenue | Subtotal |
| DAC | 28.37 | 10.25 | 4.32 | - | 2.99 | - | - | 100.31 | - | - | 146.24 |
| Solar calcination | 14.61 | - | - | - | - | 148.04 | - | 50.07 | - | - | 212.26 |
| CO2-to-SAF | 22.07 | - | - | 8.33 | 24.01 | 168.17 | -64.03 | 78.04 | - | -314.84 | -78.24 |
| Subtotal | 64.60 | 10.25 | 4.32 | 8.33 | 27.00 | 316.21 | -64.03 | 228.42 | 2.35 | -314.84 | 282.61 |

Table S23: Application and price of co-products24

| **Co-products** | **Applications** | **Price (US$/kg)** |
| --- | --- | --- |
| Natural gas | Fuel | 0.26 |
| Ethane | Refrigerant | 0.17 |
| Ethylene | Plastics | 0.58 |
| Propane | Fuel | 0.33 |
| Propylene | Plastics | 0.83 |
| Butane | Fuel | 0.36 |
| Butene | Plastics | 1.27 |
| Light naphtha (C5-C7) | Fuel | 0.38 |

Table S24: Historical price of jet fuel and sustainable aviation fuel26

| **Price Year** | **Jet Fuel (US$/t)** | **SAF (US$/t)** |
| --- | --- | --- |
| 2019 | 628 | NA |
| 2020 | 365 | 1412 |
| 2021 | 613 | 2140 |
| 2022 | 1094 | 2437 |

Table S25: Technical parameters of CSP

| **Parameters** | **Value** | **Units** | **Comments** |
| --- | --- | --- | --- |
| Average CaCO3 flow rate to the solar calciner | 285.3 | tCaCO3/hr | Calculated from the process model |
| Solar power | 712.97 | MWth | Calculated from the process model |
| Single heliostat geometry | 12.2 x 12.2 | m | Adopt design from the CSP plant |
| Size of the single solar calciner | 39.61 | MWth | Calculated from the process model |
| Scaling factor of the solar calciner | 13.35 | NA | Determined from solar calciner scaling |
| Hydrogen fluidisation flow rate in a single solar calciner | 1.35 | tH2/hr | Determined from solar calciner scaling |
| Number of solar CSP plants | 18 | NA | Determined from solar calciner scaling and process model |
| Total solar field area | 98.79 | acres | Calculated from SAM |
| Non-solar field land area | 45 | acres | Obtained from SAM |
| DNI | 2516.2 | kWh/m2/yr | Obtained from Global Solar Atlas |
| Solar multiple | 2.4 | NA | Calculated from the process model |
| Thermal efficiency of solar calciner | 60 | % | Assumed based on literature27 |


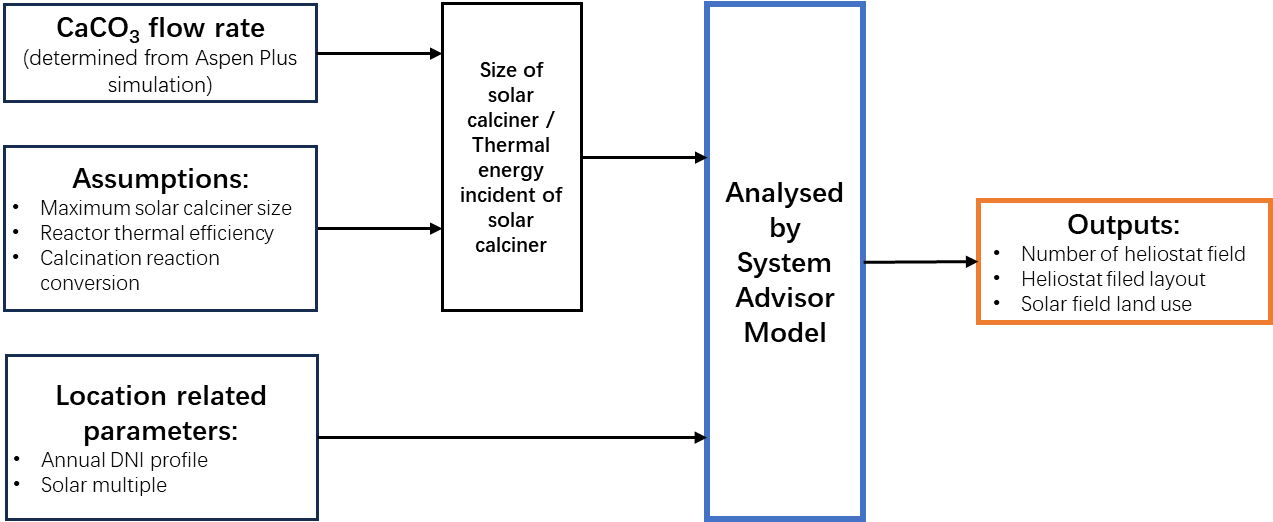


Figure S11: Principle of SAM analysis

The System Advisor Model (SAM) is a tool for designing and optimizing heliostat fields for solar towers based on an annual performance calculation. Based on the selected locations29, the SAM is used to calculate the requirement of heliostat field area and land area. The imported weather conditions (e.g., annual DNI and wind speed) are from NREL’s National Solar Radiation Database (NSRD)28.


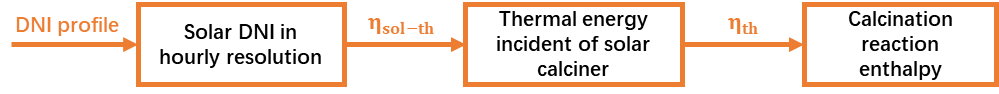


Figure S12: Energy flow diagram of solar calcination

Solar-to-thermal energy efficiency (), which is defined as the ratio of the solar calciner’s thermal energy input to the solar beam irradiation in the solar field. This value is automatically calculated by SAM.

Thermal efficiency (), which is defined as the ratio of calcination reaction enthalpy to the solar calciner’s thermal energy input. This value is assumed as 60% referring to the literature27.

Table S26: Five selected CSP project locations28 used for geographical analysis

| **Project** | **Country** | **Longitude (deg)** | **Latitude (deg)** | **Averaged T (℃)** | **Relative Humidity (%)** | **Capacity** | **Technology** | **SM** | **Status** |
| --- | --- | --- | --- | --- | --- | --- | --- | --- | --- |
| Crescent Dunes | USA | 39.17 | -119.78 | 12.5 | 42.7 | 110 MW | Solar power tower | 3 | Operational since 2015 |
| Cerro Dominador | Chile | -22.46 | -68.93 | 15.7 | 17.6 | 110 MW | Solar power tower | 2.4 | Operational since 2021 |
| Planta Solar 20 | Spain | 37.45 | -6.26 | 19.1 | 58.9 | 20 MW | Solar power tower | 3 | Operational since 2009 |
| Redstone CSP Project | South Africa | -28.31 | 23.38 | 18.2 | 28.8 | 100 MW | Solar power tower | 2.7 | Operational since 2023 |
| Shouhang Dunhuang Phase II | China | 40.05 | 94.42 | 12.0 | 22.5 | 100 MW | Solar power tower | 3 | Operational since 2018 |

Table S27: Regional hydrogen cost29-31, PV cost32 and WACC33

| **Country** | **Hydrogen production technology and cost (US$/kg)** | | | | **PV electricity price (US$/MWh)** | **WACC (%)** |
| --- | --- | --- | --- | --- | --- | --- |
| AE | PEM | SOEC | SMR with CCS |
| USA | 2.5 - 4.0 | 3.0 - 5.0 | 4.5 - 6.5 | 1.5 - 2.0 | 41 | 5.10 |
| Chile | 1.8 - 3.2 | 2.5 - 4.0 | 3.8 - 5.8 | 1.2 - 1.7 | 32 | 9.20 |
| Spain | 2.2 - 3.7 | 2.8 - 4.3 | 4.0 - 6.0 | 1.4 - 1.9 | 36 | 4.20 |
| South Africa | 2.3 - 3.8 | 2.9 - 4.4 | 4.2 - 6.2 | 1.3 - 1.8 | 42 | 11.80 |
| China | 2.0 - 3.5 | 2.7 - 4.2 | 3.9 - 5.9 | 1.1 - 1.6 | 23 | 6.60 |

## Note S6: Sensitivity analysis

All process analyses of air contactors are under the same liquid solvent composition (2 M K+, 1.1 M OH-, 0.45 M CO32-) because the rate-based model was specifically developed under this circumstance. The process analysis was carried out for CO2 concentration in the air, air velocity (Vair), air travel distance (ATD) and the ratio of the mass flow rate of liquid solvent over the mass flow rate of air (L/G ratio).


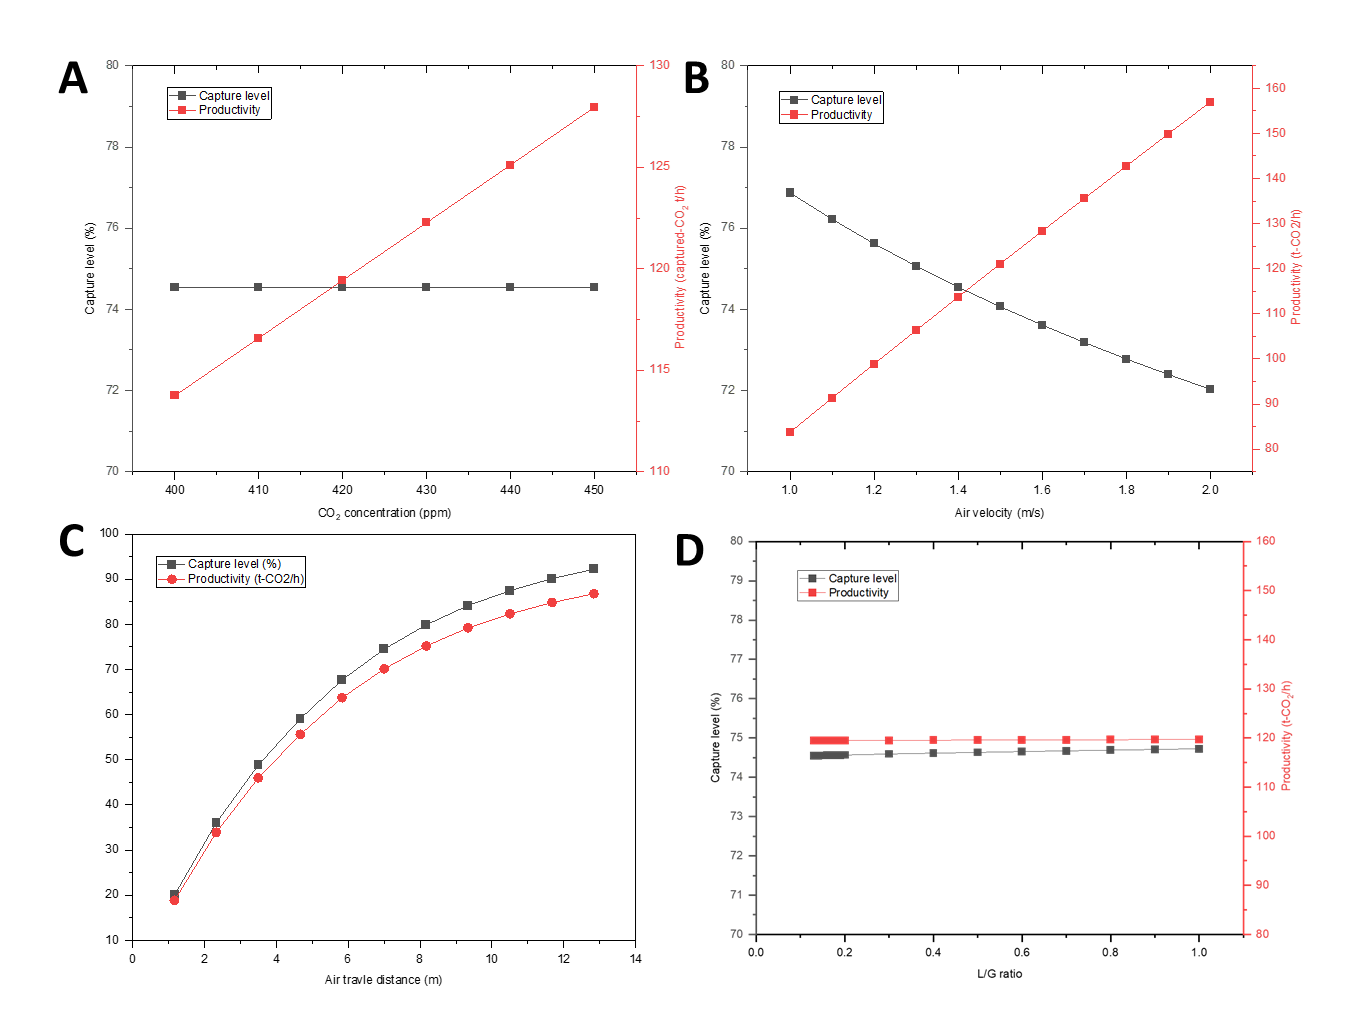


Figure S13: Impact of operating and design variables on capture level and productivity. Variables are (A) CO2 concentration in the air, (B) air velocity, (C) air travel distance and (D) L/G ratio.


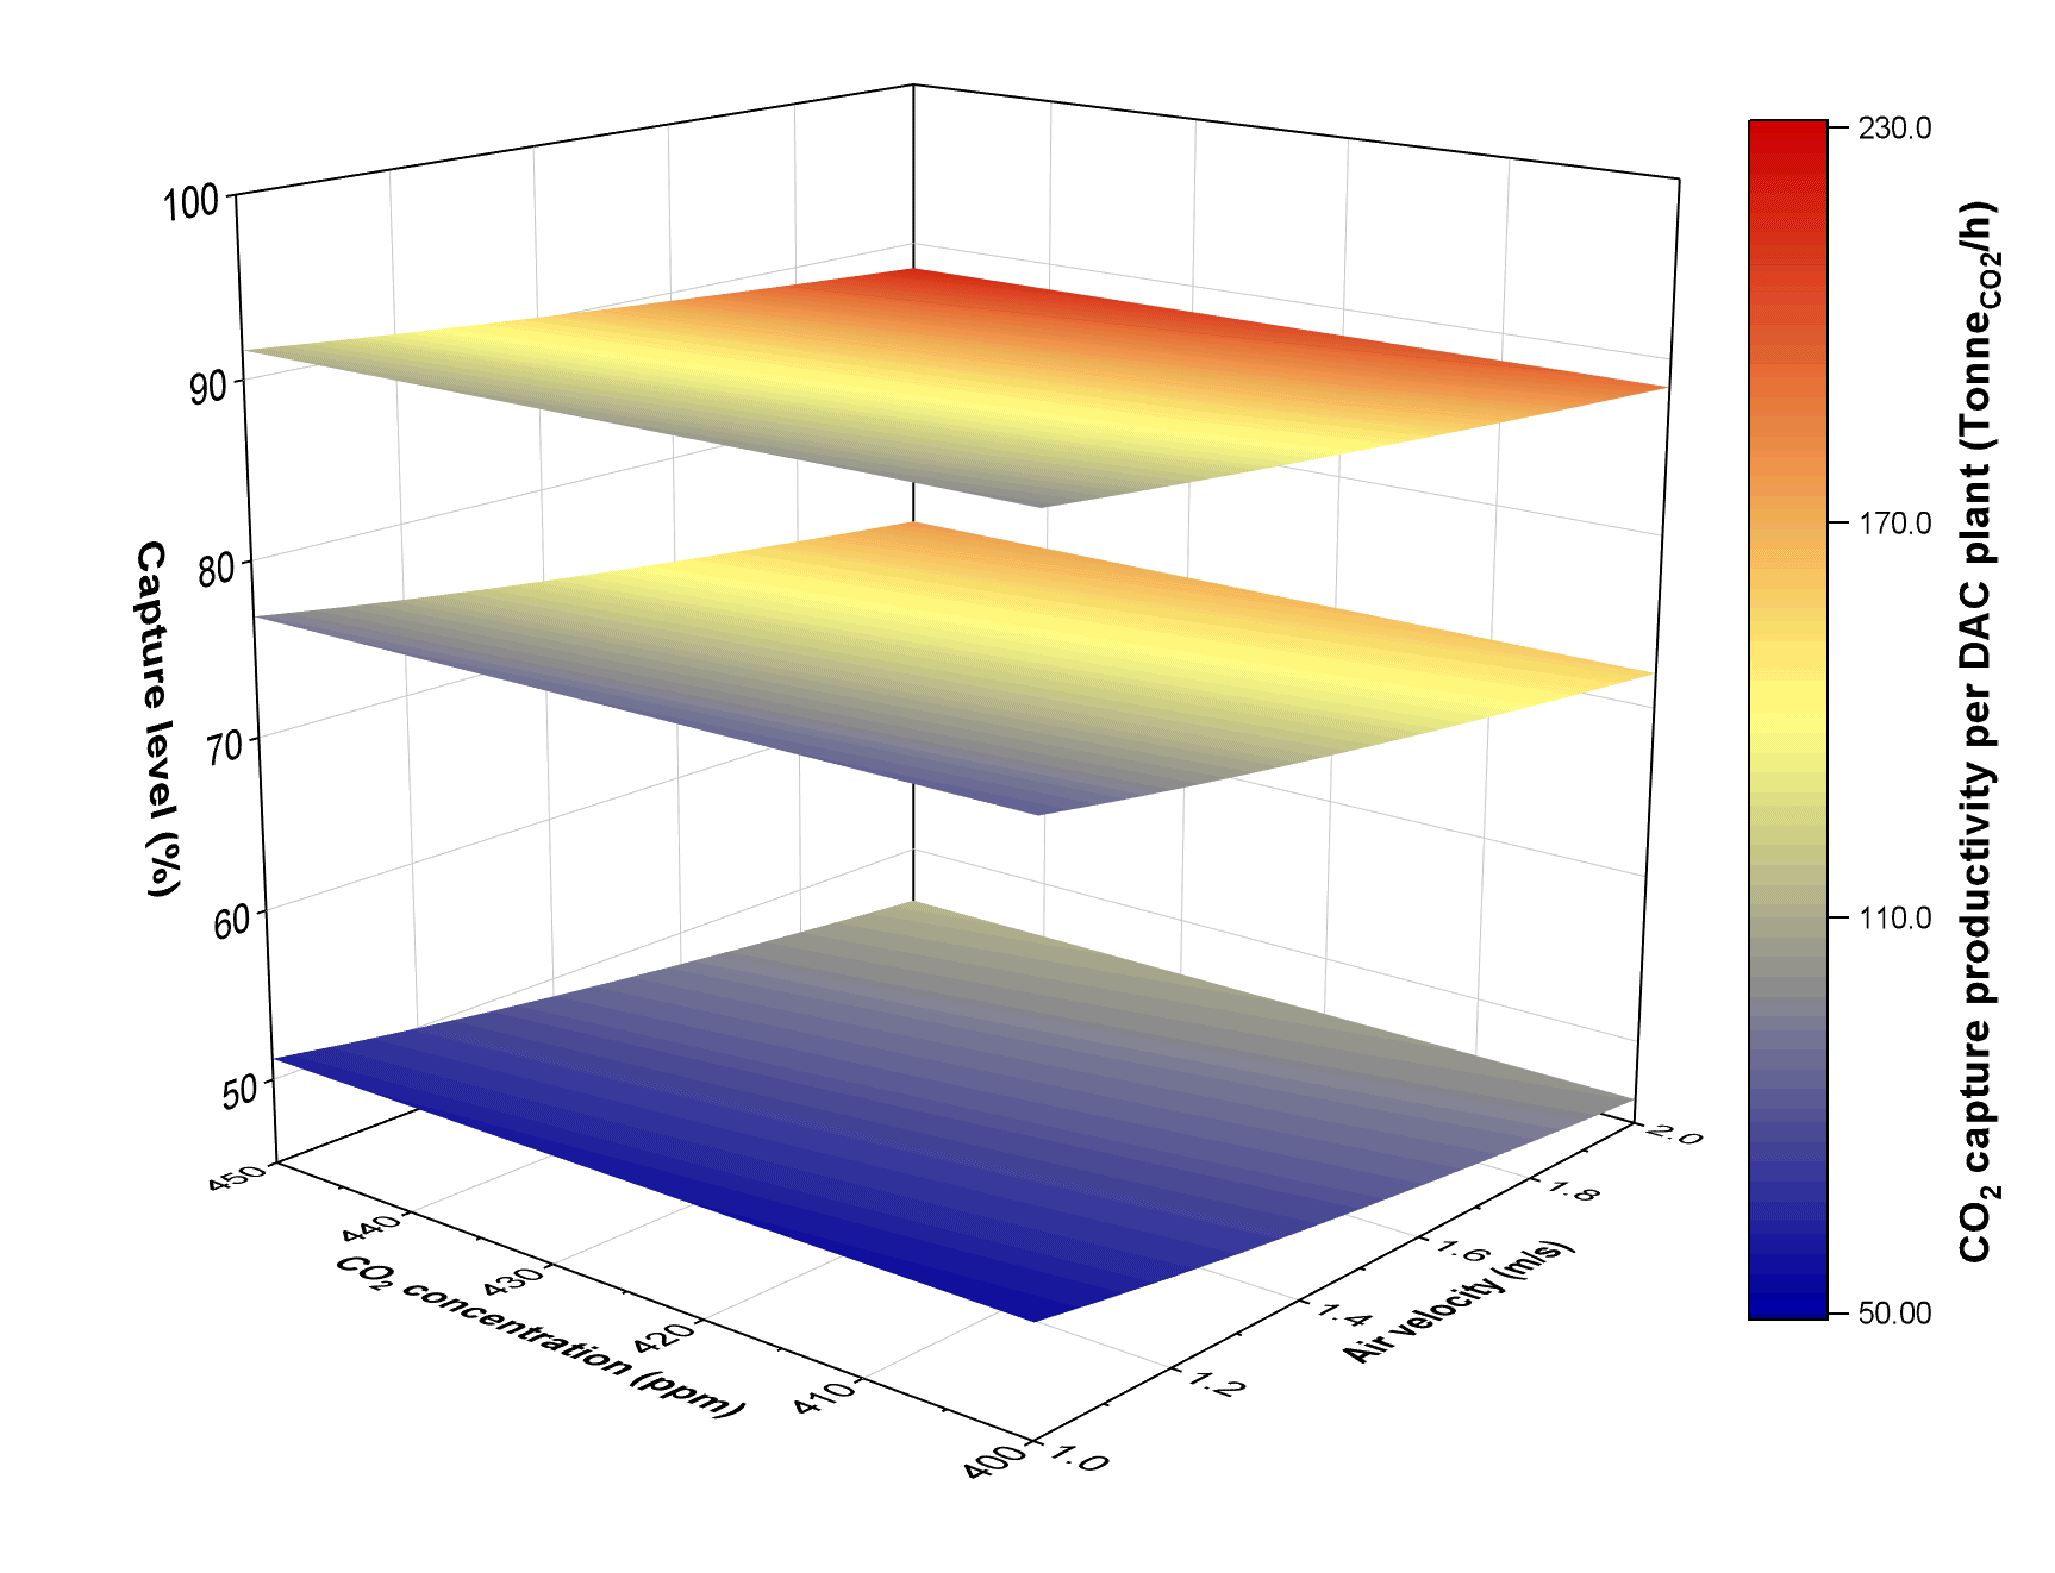


Figure S14: Map of DAC CO2 capture productivity. CO2 productivity as a function of CO2 concentration in the air, air velocity, and air travel distance (ATD). Three coloured layers represent capture level at around 50%, 75% and 90% with 3 segments (3.5 m ATD), 6 segments (7 m ATD) and 10 segments (11.7 m ATD) Brentwood XF12560 packing, respectively.


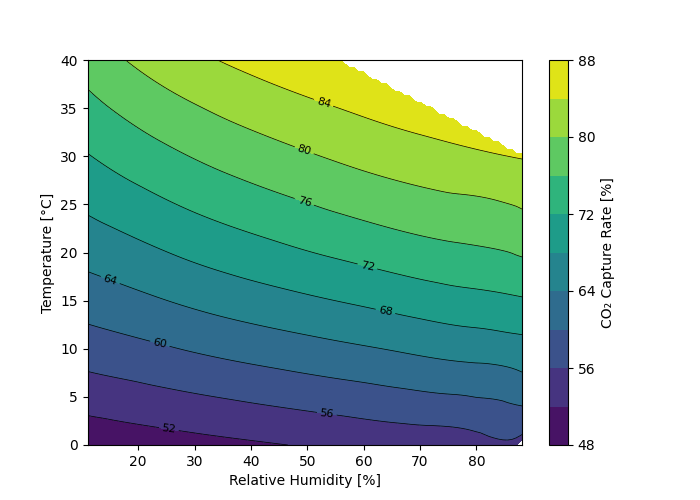


Figure S15: CO2 capture rate at different relative humidity and temperature ranges (White-coloured area represents unreachable air conditions).

Table S28: Sensitivity analysis of parameters for DAC—material requirement and electricity consumption under different operating conditions

| **Parameter** | **Pr** | **conc** | **Vair** | **ATD** | **CL** | **Fair** | **FKOH** | **ReKOH** | **FCa(OH)2** | **Fwater** | **Fan** | **Efan** | **Epump** | **EDAC** | **FCaCO3** |
| --- | --- | --- | --- | --- | --- | --- | --- | --- | --- | --- | --- | --- | --- | --- | --- |
|
| **Unit** | **t-CO2/h** | **ppm** | **m/s** | **m** | **%** | **kt/h** | **kt/h** | **%** | **t/h** | **t** | **Pa** | **kWh/t-CO2** | **kWh/t-CO2** | **kWh/t-CO2** | **t/h** |
| **Base case** | 119.4 | 420 | 1.4 | 7 | 74.5 | 251.0 | 32.6 | 99.7 | 716.5 | 516.1 | 85.7 | 57.4 | 42.1 | 99.5 | 238.7 |
| **400 ppm** | 113.7 | 400 | 1.4 | 7 | 74.5 | 251.0 | 32.6 | 99.7 | 682.4 | 489.7 | 85.7 | 60.3 | 44.2 | 104.5 | 271.7 |
| **450 ppm** | 128.0 | 450 | 1.4 | 7 | 72.0 | 251.0 | 32.6 | 99.7 | 767.7 | 555.8 | 85.7 | 53.6 | 39.3 | 92.9 | 305.7 |
| **1m/s Vair** | 88.0 | 420 | 1 | 7 | 76.9 | 179.3 | 23.3 | 99.7 | 527.7 | 369.8 | 43.0 | 27.9 | 40.9 | 68.8 | 210.1 |
| **2m/s Vair** | 164.9 | 420 | 2 | 7 | 74.5 | 358.6 | 46.6 | 99.7 | 989.1 | 727.4 | 181.4 | 125.8 | 43.6 | 169.4 | 393.8 |
| **3.5m ATD** | 78.3 | 420 | 1.4 | 3.5 | 48.9 | 251.0 | 16.3 | 99.7 | 469.6 | 324.7 | 51.0 | 52.1 | 32.1 | 84.2 | 187.0 |
| **11.7m ATD** | 144.4 | 420 | 1.4 | 11.7 | 90.1 | 251.0 | 54.5 | 99.7 | 866.4 | 632.3 | 126.1 | 69.8 | 58.2 | 128.1 | 345.0 |

Under different operating conditions, the L/G ratio and packing wetting condition were maintained the same. The airflow rate was based on CO2 concentration in the air (conc) and air velocity (Vair). Thereby, the KOH solvent flow rate (FKOH) was determined by the inlet air flow rate (Fair).The mass flow rate of Ca(OH)2 slurry (FCa(OH)2) depends on how much CO2 is captured by the air contactor for subsequent decomposition in the pellet reactor with calcium ions. The water flow rate (Fwater) is based on the mass balance of the process model.

Electricity demand for DAC is influenced by a combination of parameters (Vair, ATD and conc). In the optimistic scenario, higher Vair increases the volume of air processed and thus requires higher solvent flow rates and greater fan and pump power. Longer ATD requires more liquid to wet the packing column, increasing pump energy. Higher conc reduces electricity demand due to improved capture productivity (Pr). Conversely, in the pessimistic scenarios, lower Vair and shorter ATD result in reduced airflow and solvent use, which decreases fan and pump electricity demand. While for the lower conc case, the system requires more electricity.

Figure S16: Potential heat integration in the CO2-to-SAF section at base case scenario. Using a heat recovery strategy and pinch analysis, the heat from 450°C mixed gas (Stream 209) and 300°C syncrude (Stream 307) can be recovered to preheat the 40°C gas (Stream 305). This heat recovery results in the savings of 176.55 MW for heating in the CO2-to-SAF section.

Table S29: Sensitivity analysis summary of MSP, related to Fig. 4d

| **Sensitivity parameter** | **Sensitivity parameter ranges** | | | | **MSP (US$/kg)** | | **%MSP difference (from base case)** | | **Justification and parameter range** |
| --- | --- | --- | --- | --- | --- | --- | --- | --- | --- |
| Unit | Optimistic case | Base case | Pessimistic case | Optimistic MSP | Pessimistic MSP | Optimistic% | Pessimistic% |
| CO2 concentration | ppm | 450 | 420 | 400 | 4.58 | 4.65 | -0.9 | 0.6 | Ranges of CO2 concentration in the air34. 450 ppm represents the global warming 2℃ target. |
| Air velocity | m/s | 2 | 1.4 | 1 | 4.42 | 4.79 | -4.5 | 3.6 | Carbon Engineering’s pilot plant operation condition2 |
| Air travel distance | m | 11.7 | 7 | 3.5 | 4.51 | 4.85 | -2.5 | 4.8 | Based on the process model, controlling the air travel distance, the CO2 capture rate was modelled at around 50%, 75% and 90% |
| Temperature | ℃ | 30 | 21 | 0 | 4.57 | 4.85 | -1.2 | 5.0 | Based on process model and ref35 |
| Relative humidity | % | 80 | 64 | 20 | 4.62 | 4.70 | -0.1 | 1.6 | Based on process model and ref35 |
| Thermal efficiency of solar calciner | % | 80% | 60% | 40% | 4.50 | 4.86 | -2.7 | 5.1 | Referring to CSP plant27,36 |
| Solar multiple | NA | 2.5 | 3 | 3.5 | 4.45 | 4.78 | -3.8 | 3.3 | Referring to the CSP plant28,37 |
| CAPEX of CSP | US$M | 189.5 | 378.9 | 568.4 | 4.38 | 4.87 | -5.4 | 5.4 | 50% based on process model |
| Gas recovery ratio | % | 99 | 90 | 80 | 3.96 | 5.37 | -14.4 | 16.1 | Based on process model |
| Hydrogen production cost | US$/kg | 1 | 2 | 3 | 3.50 | 5.75 | -24.3 | 24.3 | Baseline is at US$2/kg which is the short-term USA target38. US$1/kg is the long-term target. Sensitivity analysis investigates 50% of hydrogen production cost. |
| Plant lifetime | year | 40 | 30 | 20 | 4.56 | 4.82 | -1.4 | 4.1 | Baseline is at 30 years, and sensitivity analysis investigates 10 years of plant lifetime39 |
| WACC | % | 5 | 10 | 15 | 3.93 | 5.40 | -14.9 | 16.8 | Baseline is at 10%40, and sensitivity analysis investigates 50% of WACC33. |
| PV electricity price | US$/MWh | 10 | 30 | 60 | 4.49 | 4.82 | -2.8 | 4.2 | PV cost based on ref32 |
| Land cost | US$/m2 | 1.24 | 2.47 | 49.42 | 4.62 | 4.97 | -0.2 | 7.5 | Baseline land cost is based on ref22. The optimistic case uses -50% cost while the pessimistic cost is based on ref41. |

Table S30: Sensitivity analysis summary of LCOD, related to Fig. 4e

| **Sensitivity parameter** | **Sensitivity parameter ranges** | | | | **LCOD (US$/t CO2)** | | **%LCOD difference (from base case)** | | **Justification and parameter range** |
| --- | --- | --- | --- | --- | --- | --- | --- | --- | --- |
| Unit | Optimistic case | Base case | Pessimistic case | Optimistic LCOD | Pessimistic LCOD | Optimistic% | Pessimistic% |
| CO2 concentration | ppm | 450 | 420 | 400 | 277.0 | 286.2 | -2.0 | 1.3 | Ranges of CO2 concentration in the air34. 450 ppm represents the global warming 2℃ target. |
| Air velocity | m/s | 2 | 1.4 | 1 | 255.8 | 303.9 | -9.5 | 7.6 | Carbon Engineering’s pilot plant operation condition2 |
| Air travel distance | m | 11.7 | 7 | 3.5 | 267.4 | 311.5 | -5.4 | 10.2 | Based on the process model, controlling the air travel distance, the CO2 capture rate was modelled at around 50%, 75% and 90% |
| Temperature | ℃ | 30 | 21 | 0 | 275.4 | 313.3 | -2.5 | 10.5 | Based on process model and ref35 |
| Relative humidity | % | 80 | 64 | 20 | 281.8 | 292.4 | -0.3 | 3.5 | Based on process model and ref35 |
| Thermal efficiency of solar calciner | % | 80% | 60% | 40% | 266.3 | 313.3 | -5.8 | 10.9 | Referring to CSP plant27,36 |
| Solar multiple | NA | 2.5 | 3 | 3.5 | 260.1 | 302.4 | -8.0 | 7.0 | Referring to the CSP plant28,37 |
| CAPEX of CSP | US$M | 189.5 | 378.9 | 568.4 | 250.5 | 314.7 | -11.4 | 11.4 | 50% based on process model |
| Gas recovery ratio | % | 99 | 90 | 80 | 226.2 | 330.8 | -20.0 | 17.0 | Based on process model |
| SAF market price | US$/kg | 1.24 | 2.47 | 3.71 | 125.2 | 440.0 | -55.7 | 55.7 | Baseline SAF market price uses 2022 data26. Sensitivity analysis investigates 50% of SAF market price. |
| Hydrogen production cost | US$/kg | 1 | 2 | 3 | 137.6 | 427.7 | -51.3 | 51.3 | Baseline is at US$2/kg which is the short-term USA target38. US$1/kg is the long-term target. Sensitivity analysis investigates 50% of hydrogen production cost. |
| Plant lifetime | Year | 40 | 30 | 20 | 274.3 | 307.4 | -2.9 | 8.8 | Baseline is at 30 years, and sensitivity analysis investigates 10 years of plant lifetime39 |
| WACC | % | 5 | 10 | 15 | 193.4 | 383.2 | -31.6 | 35.6 | Baseline is at 10%40, and sensitivity analysis investigates 50% of WACC33. |
| PV electricity price | US$/MWh | 10 | 30 | 60 | 265.4 | 308.0 | -6.0 | 9.0 | PV cost based on ref32 |
| Land cost | US$/m2 | 1.24 | 2.47 | 49.42 | 281.4 | 327.2 | -0.4 | 15.8 | Baseline land cost is based on ref22. The optimistic case uses -50% cost while the pessimistic cost is based on ref41. |

# Supplemental References

1 Sabatino, F. *et al.* A comparative energy and costs assessment and optimization for direct air capture technologies. *Joule* **5**, 2047-2076 (2021).

2 Keith, D. W., Holmes, G., Angelo, D. S. & Heidel, K. A process for capturing CO2 from the atmosphere. *Joule* **2**, 1573-1594 (2018).

3 Holmes, G. J. *A carbon dioxide absorption performance evaluation for capture from ambient air*, University of Calgary, (2010).

4 CoolingTowerDepot®. *The depot of all cooling towers*, <<http://www.coolingtowerdepot.com/content/cooling-towers>> (2023).

5 Fair, J. R., Seibert, A. F., Behrens, M., Saraber, P. & Olujic, Z. Structured packing performance experimental evaluation of two predictive models. *Industrial & Engineering Chemistry Research* **39**, 1788-1796 (2000).

6 Heidel, K., Keith, D., Singh, A. & Holmes, G. Process design and costing of an air-contactor for air-capture. *Energy Procedia* **4**, 2861-2868 (2011).

7 Holmes, G. & Keith, D. W. An air–liquid contactor for large-scale capture of CO2 from air. *Philosophical Transactions of the Royal Society A: Mathematical, Physical and Engineering Sciences* **370**, 4380-4403 (2012).

8 de Jonge, M. M., Daemen, J., Loriaux, J. M., Steinmann, Z. J. & Huijbregts, M. A. Life cycle carbon efficiency of Direct Air Capture systems with strong hydroxide sorbents. *International Journal of Greenhouse Gas Control* **80**, 25-31 (2019).

9 Holmes, G. *et al.* Outdoor prototype results for direct atmospheric capture of carbon dioxide. *Energy Procedia* **37**, 6079-6095 (2013).

10 Madhu, K., Pauliuk, S., Dhathri, S. & Creutzig, F. Understanding environmental trade-offs and resource demand of direct air capture technologies through comparative life-cycle assessment. *Nature Energy* **6**, 1035-1044 (2021).

11 Heidel, K. & Rossi, R. United States Patent application: 0170327421. *High Temperature Hydrator (A1). Filed May* **10** (2017).

12 Robie, R. A. & Hemingway, B. S. *Thermodynamic properties of minerals and related substances at 298.15 K and 1 bar (105 Pascals) pressure and at higher temperatures*. Vol. 2131 (US Government Printing Office, 1995).

13 Hilsenrath, J. *Tables of thermal properties of gases: comprising tables of thermodynamic and transport properties of air, argon, carbon dioxide, carbon monoxide, hydrogen, nitrogen, oxygen, and steam*. Vol. 564 (US Department of Commerce, National Bureau of Standards, 1955).

14 Esence, T., Guillot, E., Tessonneaud, M., Sans, J.-L. & Flamant, G. Solar calcination at pilot scale in a continuous flow multistage horizontal fluidized bed. *Solar Energy* **207**, 367-378 (2020).

15 Yao, B. *et al.* Transforming carbon dioxide into jet fuel using an organic combustion-synthesized Fe-Mn-K catalyst. *Nature Communications* **11**, 6395 (2020).

16 Zhang, L. *et al.* Direct conversion of CO2 to a jet fuel over CoFe alloy catalysts. *The Innovation* **2**, 100170 (2021).

17 Kamkeng, A. D. & Wang, M. Technical analysis of the modified Fischer-Tropsch synthesis process for direct CO2 conversion into gasoline fuel: Performance improvement via ex-situ water removal. *Chemical Engineering Journal* **462**, 142048 (2023).

18 Todic, B. *et al.* Kinetic model of Fischer–Tropsch synthesis in a slurry reactor on Co–Re/Al2O3 catalyst. *Industrial & Engineering Chemistry Research* **52**, 669-679 (2013).

19 Donnelly, T. J., Yates, I. C. & Satterfield, C. N. Analysis and prediction of product distributions of the Fischer-Tropsch synthesis. *Energy & Fuels* **2**, 734-739 (1988).

20 Kelkar, V. V. & Ng, K. M. Development of fluidized catalytic reactors: Screening and scale‐up. *AIChE journal* **48**, 1498-1518 (2002).

21 Prats-Salvado, E., Jagtap, N., Monnerie, N. & Sattler, C. Solar-Powered Direct Air Capture: Techno-Economic and Environmental Assessment. *Environmental Science & Technology* **58**, 2282-2292 (2024).

22 Buck, R. & Sment, J. Techno-economic analysis of multi-tower solar particle power plants. *Solar Energy* **254**, 112-122 (2023).

23 Zang, G., Sun, P., Elgowainy, A. A., Bafana, A. & Wang, M. Performance and cost analysis of liquid fuel production from H2 and CO2 based on the Fischer-Tropsch process. *Journal of CO2 Utilization* **46**, 101459 (2021).

24 Yadav, G. *et al.* Techno-economic analysis and life cycle assessment for catalytic fast pyrolysis of mixed plastic waste. *Energy & Environmental Science* **16**, 3638-3653 (2023).

25 Liu, C. M., Sandhu, N. K., McCoy, S. T. & Bergerson, J. A. A life cycle assessment of greenhouse gas emissions from direct air capture and Fischer–Tropsch fuel production. *Sustainable Energy & Fuels* **4**, 3129-3142 (2020).

26 IATA. *IATA Economics*, < <https://www.iata.org/en/publications/economics/>> (2024).

27 Bellos, E. Progress in beam-down solar concentrating systems. *Progress in Energy and Combustion Science* **97**, 101085 (2023).

28 NREL. *Power Tower Projects*, <<https://solarpaces.nrel.gov/by-technology/power-tower>> (2024).

29 IEA. Global Hydrogen Review 2023 – Analysis. (2023).

30 McKinsey & Company. *Global Energy Perspective 2023: Hydrogen outlook*, <<https://www.mckinsey.com/industries/oil-and-gas/our-insights/global-energy-perspective-2023-hydrogen-outlook>> (2024).

31 Hydrogen Council. *Hydrogen Insights 2023*, <<https://hydrogencouncil.com/en/hydrogen-insights-2023/>> (2024).

32 IEA. Global Hydrogen Review 2023: Assumptions Annex. (2023).

33 Ameli, N. *et al.* Higher cost of finance exacerbates a climate investment trap in developing economies. *Nature Communications* **12**, 1-12 (2021).

34 NASA. *Carbon dioxide concentration*, <<https://climate.nasa.gov/vital-signs/carbon-dioxide/?intent=121>> (2024).

35 An, K., Farooqui, A. & McCoy, S. T. The impact of climate on solvent-based direct air capture systems. *Applied Energy* **325**, 119895 (2022).

36 Zhao, J. *et al.* Particle-based high-temperature thermochemical energy storage reactors. *Progress in Energy and Combustion Science* **102**, 101143 (2024).

37 NREL. *NSRDB: National Solar Radiation Database*, <<https://nsrdb.nrel.gov/data-viewer>> (2024).

38 Department of Energy. U.S. National Clean Hydrogen Strategy and Roadmap. (2023).

39 Fasihi, M., Efimova, O. & Breyer, C. Techno-economic assessment of CO2 direct air capture plants. *Journal of Cleaner Production* **224**, 957-980 (2019).

40 IEAGHG. Global Assessment of Direct Air Capture Costs. (2021).

41 landsearch. *Price of Land per Acre by State - LandSearch*, <<https://www.landsearch.com/price>> (2024).
